# Supplementary material for: Combining Chemical Profiling and Network Analysis to Investigate the Pharmacology of Complex Prescriptions in Traditional Chinese Medicine
Source: PubMed Central journal article supplement (PMC5233960; doi:10.1038/srep40529), 2017-01-13
Supplement: srep40529-s1.pdf [file srep40529-s1.pdf]

# Combining Chemical Profiling and Network Analysis to Investigate the Pharmacology of Complex Prescriptions in Traditional Chinese Medicine

Tongchuan Suo<sup>1,+</sup>, Jinping Liu<sup>2,+</sup>, Xi Chen<sup>1</sup>, Hua Yu<sup>2</sup>, Tenglong Wang<sup>2</sup>, Congcong Li<sup>2</sup>, Yuefei Wang<sup>2</sup>, Chunhua Wang<sup>2,\*</sup>, and Zheng Li<sup>1,2,\*</sup>

<sup>1</sup>College of Pharmaceutical Engineering of Traditional Chinese Medicine, Tianjin University of Traditional Chinese Medicine, Tianjin 300193, PR China

<sup>2</sup>Tianjin Key Laboratory of Modern Chinese Medicine, Tianjin University of Traditional Chinese Medicine, Tianjin 300193, PR China

\*Correspondence should be addressed to C.W. (pharmwch@126.com) or Z.L. (lizheng@tjutcm.edu.cn).

+These authors contribute equally to this work.

**Supplementary information**

Supplementary Table S1. Chemical information of the ingredients identified from DJF formula.

| T <sub>R</sub> (min) | Formula                                                         | ES <sup>-</sup> (m/z)<br>[M-H] <sup>-</sup> (ppm) | MS <sup>2</sup>                                                                                                  | ES(m/z) <sup>+</sup><br>[M+H] <sup>+</sup> (ppm) | MS <sup>2</sup>                                                                                                                       | Identification                       |
|----------------------|-----------------------------------------------------------------|---------------------------------------------------|------------------------------------------------------------------------------------------------------------------|--------------------------------------------------|---------------------------------------------------------------------------------------------------------------------------------------|--------------------------------------|
| 1                    | C <sub>12</sub> H <sub>22</sub> O <sub>11</sub>                 | 341.1095(3.2)                                     | 179.0560[M-H-Glc] <sup>-</sup><br>161.0455[M-H-Glc-H <sub>2</sub> O] <sup>-</sup>                                | 343.1240(0.0)                                    | 325.1138[M+H-H <sub>2</sub> O] <sup>+</sup>                                                                                           | Sucrose                              |
| 2                    | C <sub>10</sub> H <sub>12</sub> N <sub>5</sub> O <sub>6</sub> P | 328.0449(0.6)                                     | 134.0465[ADE] <sup>-</sup><br>195.0653[DTFD] <sup>-</sup>                                                        | 330.0596(-2.1)                                   | 136.0625[M+H-HDTDO] <sup>+</sup>                                                                                                      | cAMP                                 |
| 3                    | C <sub>6</sub> H <sub>8</sub> O <sub>7</sub>                    | 191.0195(1.6)                                     | 173.0086[M-H-H <sub>2</sub> O] <sup>-</sup><br>111.0083[M-H-CO <sub>2</sub> -2<br>H <sub>2</sub> O] <sup>-</sup> | 193.0347(-0.5)                                   |                                                                                                                                       | Citric acid                          |
| 4                    | C <sub>16</sub> H <sub>24</sub> O <sub>10</sub>                 | 375.1293(0.5)                                     | 345.1188[M-H-CH <sub>2</sub> O] <sup>-</sup>                                                                     | 377.1438(-2.7)                                   | 215.0922[M+H-Glc] <sup>+</sup><br>197.0816[M+H-Glc-H <sub>2</sub> O] <sup>+</sup>                                                     | 8-Diebenzoylpaeoniflorin             |
| 5                    | C <sub>19</sub> H <sub>26</sub> O <sub>15</sub>                 | 493.1193(0.0)                                     | 331.0663[M-H-Glc] <sup>-</sup><br>313.0559[M-H-Glc-H <sub>2</sub> O] <sup>-</sup><br>169.0136[GA-H] <sup>-</sup> | 517.1171[M+Na] <sup>+</sup>                      | 315.0743[M+H-Glc-H <sub>2</sub> O] <sup>+</sup><br>153.0182[GA-H <sub>2</sub> O+H] <sup>+</sup>                                       | 6'-o-galloylsucroses or its isomer   |
| 6                    | C <sub>7</sub> H <sub>6</sub> O <sub>5</sub>                    | 169.0135(-1.2)                                    | 125.0237[M-H-CO <sub>2</sub> ] <sup>-</sup>                                                                      | 171.0291(-1.2)                                   |                                                                                                                                       | Gallic acid                          |
| 7                    | C <sub>19</sub> H <sub>26</sub> O <sub>15</sub>                 | 493.1200(1.4)                                     | 313.0572[M-H-Glc-H <sub>2</sub> O] <sup>-</sup><br>169.0139[GA-H] <sup>-</sup>                                   | 517.1183[M+Na] <sup>+</sup>                      | 315.0710[M+H-Glc-H <sub>2</sub> O] <sup>+</sup><br>153.0185[GA-H <sub>2</sub> O+H] <sup>+</sup>                                       | 6'-o-galloylsucroses or its isomer   |
| 8                    | C <sub>19</sub> H <sub>26</sub> O <sub>15</sub>                 | 493.1194(0.2)                                     | 331.0661[M-H-Glc] <sup>-</sup><br>313.0560[M-H-Glc-H <sub>2</sub> O] <sup>-</sup>                                | 517.1147[M+Na] <sup>+</sup>                      | 315.0714[M+H-Glc-H <sub>2</sub> O] <sup>+</sup><br>153.0185[GA-H <sub>2</sub> O+H] <sup>+</sup>                                       | 6'-o-galloylsucroses or its isomer   |
| 9                    | C <sub>16</sub> H <sub>24</sub> O <sub>9</sub>                  | 359.1343(0.3)                                     | 197.0810[M-H-Glc] <sup>-</sup><br>179.0704[M-H-Glc-H <sub>2</sub> O] <sup>-</sup>                                | 361.1515(4.4)                                    | 199.0969[M+H-Glc] <sup>+</sup><br>181.0863[M+H-Glc-H <sub>2</sub> O] <sup>+</sup><br>163.0759[M+H-Glc-2H <sub>2</sub> O] <sup>+</sup> | 1-o-β-D-glucopyranosyl-paeonisufrone |
| 10                   | C <sub>23</sub> H <sub>28</sub> O <sub>14</sub> S               | 559.1129(1.3)                                     | 527.1439[M-H-CH <sub>2</sub> OH] <sup>-</sup><br>483.0776[M-H-CH <sub>2</sub> OH-C                               |                                                  |                                                                                                                                       | Oxypaeoniflorin sulfonate            |

|    |       |                                                   |                |                                                                                                                                                                              |               |                                                                                                    |                                               |
|----|-------|---------------------------------------------------|----------------|------------------------------------------------------------------------------------------------------------------------------------------------------------------------------|---------------|----------------------------------------------------------------------------------------------------|-----------------------------------------------|
|    |       |                                                   |                | O <sub>2</sub> ] <sup>-</sup>                                                                                                                                                |               |                                                                                                    |                                               |
| 11 | 1.806 | C <sub>23</sub> H <sub>28</sub> O <sub>14</sub>   | 527.1393(-1.5) | 397.1323[M-H-Glc] <sup>-</sup><br>315.0714[M-H-GA-Glc] <sup>-</sup>                                                                                                          |               |                                                                                                    | 6'-o-galloyl<br>desbenzoylpaeoniflorin isomer |
| 12 | 2.104 | C <sub>16</sub> H <sub>26</sub> O <sub>9</sub>    | 361.1482(-4.7) | 169.0131[GA-H] <sup>-</sup>                                                                                                                                                  |               | 201.0472[M+H-Glc] <sup>+</sup>                                                                     | 6-o-β-D-glucopyranosyl-lactinolid<br>e        |
| 13 | 2.155 | C <sub>23</sub> H <sub>28</sub> O <sub>14</sub>   | 527.1400(-0.2) | 497.1293[M-H-HCHO] <sup>-</sup>                                                                                                                                              |               | 183.1027[M+H-Glc-H <sub>2</sub> O] <sup>+</sup>                                                    | 8-o-galloyl<br>desbenzoylpaeoniflorin         |
|    |       |                                                   |                | 479.1199[M-H-HCHO-H <sub>2</sub><br>O-H] <sup>-</sup>                                                                                                                        |               |                                                                                                    |                                               |
| 14 | 2.269 | C <sub>21</sub> H <sub>24</sub> O <sub>11</sub>   | 451.1232(-1.8) | 169.0138[GA-H] <sup>-</sup><br>289.0709[M-H-Glc] <sup>-</sup>                                                                                                                |               | 291.0874[M+H-Glc] <sup>+</sup>                                                                     | Catechin-5-o-glucoside                        |
| 15 | 2.367 | C <sub>29</sub> H <sub>38</sub> O <sub>18</sub> S | 705.1693(-1.1) | 583.1345[M-H-BZ] <sup>-</sup><br>555.11733[M-H-BZ-CO] <sup>-</sup>                                                                                                           |               | 273.0793[M+H-Glc-H <sub>2</sub> O] <sup>+</sup><br>501.1032[M+H-Glc-CO <sub>2</sub> ] <sup>+</sup> | Isomaltopaeoniflorin sulfonate                |
| 16 | 2.401 | C <sub>23</sub> H <sub>28</sub> O <sub>14</sub>   | 527.1409(1.5)  | 543.1164[M-H-Glc] <sup>-</sup><br>497.1272[M-H-HCHO] <sup>-</sup>                                                                                                            |               | 333.0446[GA+ Glc+H] <sup>+</sup>                                                                   | 6'-o-galloyl<br>desbenzoylpaeoniflorin        |
|    |       |                                                   |                | 483.0770[M-H-CO <sub>2</sub> -H] <sup>-</sup>                                                                                                                                |               |                                                                                                    |                                               |
| 17 | 2.504 | C <sub>23</sub> H <sub>28</sub> O <sub>12</sub>   | 495.1508(1.0)  | 313.0553[GA+ Glc-H] <sup>-</sup><br>461.1665[M-H-2OH] <sup>-</sup><br>345.1194[M-H-BZ-CO] <sup>-</sup><br>333.0984[M-H-Glc] <sup>-</sup><br>137.0240[4-OH-BZ-H] <sup>-</sup> | 497.1665(1.2) | 335.1119[M+H-Glc] <sup>+</sup>                                                                     | Oxypaeoniflorin                               |

|    |       |                                                   |                |                                                                                                                                                                                                       |                |                                                                                 |                                                           |
|----|-------|---------------------------------------------------|----------------|-------------------------------------------------------------------------------------------------------------------------------------------------------------------------------------------------------|----------------|---------------------------------------------------------------------------------|-----------------------------------------------------------|
| 18 | 2.549 | C <sub>23</sub> H <sub>28</sub> O <sub>13</sub> S | 543.1172(0.0)  | 421.0798[M-H-BZ] <sup>-</sup><br>375.0751[M-H-BZ-HCOO<br>H] <sup>-</sup><br>121.0288[BZ-H] <sup>-</sup>                                                                                               |                | 383.0782[M+H-Glc] <sup>+</sup><br>261.0410[M+H-Glc-BZ] <sup>+</sup>             | Paeoniflorin sulfonate                                    |
| 19 | 2.669 | C <sub>23</sub> H <sub>28</sub> O <sub>12</sub>   | 495.1502(-0.2) | 465.0675[M-H-HCHO] <sup>-</sup><br>345.1180[M-H-BZ-CO] <sup>-</sup><br>333.1013[M-H- Glc] <sup>-</sup><br>313.0549[M-H-BZ-CH <sub>3</sub> OH<br>-CO] <sup>-</sup><br>137.0241[2-OH-BZ-H] <sup>-</sup> |                | 317.1034[M+H-Glc-H <sub>2</sub> O] <sup>+</sup>                                 | Palicylpaeoniflorin                                       |
| 20 | 2.915 | C <sub>27</sub> H <sub>24</sub> O <sub>18</sub>   | 635.0890(0.9)  | 465.0662[M-H-GA] <sup>-</sup><br>295.0473[M-H-2GA] <sup>-</sup><br>169.0131[GA-H] <sup>-</sup>                                                                                                        |                | 467.0325[M+H-GA] <sup>+</sup><br>449.0656[M+H-GA-H <sub>2</sub> O] <sup>+</sup> | Trigalloyglucose                                          |
| 21 | 2.967 | C <sub>24</sub> H <sub>30</sub> O <sub>13</sub>   | 525.1608(0.0)  | 495.1511[M-H-HCHO] <sup>-</sup><br>363.1055[M-H-Glc] <sup>-</sup><br>167.0345[HB-H] <sup>-</sup>                                                                                                      |                | 347.1153[M+H-Glc-H <sub>2</sub> O] <sup>+</sup>                                 | Mudanpioside E                                            |
| 22 | 3.001 | C <sub>21</sub> H <sub>22</sub> O <sub>9</sub>    | 417.1177(-2.2) | 255.0659[M-H-Glc] <sup>-</sup><br>135.0083[M-H-VP] <sup>-</sup>                                                                                                                                       | 419.1339(-0.7) | 257.0813[M+H-Glc] <sup>+</sup><br>137.0233[M+H-VP] <sup>+</sup>                 | Liquiritin isomer                                         |
| 23 | 3.098 | C <sub>32</sub> H <sub>40</sub> O <sub>18</sub>   | 711.2124(-1.7) | 549.1597[M-H-Glc] <sup>-</sup><br><br>417.1163[M-H-Glc-Api-H]<br>-<br>255.0652[M-H-2Glc-Api] <sup>-</sup>                                                                                             |                | 419.1306[M+H-Glc-Api] <sup>+</sup><br><br>257.0802[M+H-2Glc-Api] <sup>+</sup>   | Liquiritigenin-7-o-Glucoside-4'-o-<br>Apiosyl-o-Glucoside |
| 24 | 3.167 | C <sub>20</sub> H <sub>16</sub> O <sub>13</sub>   | 463.0514(0.2)  | 300.9979 [M-H-Glc] <sup>-</sup>                                                                                                                                                                       | 465.0673(0.9)  | 303.0128[M+H-Glc] <sup>+</sup>                                                  | Ellagic acid-hexoside                                     |
| 25 | 3.247 | C <sub>29</sub> H <sub>38</sub> O <sub>16</sub>   | 641.2088(0.9)  | 519.1747[M-H-BZ] <sup>-</sup><br>489.1619[M-H-BZ-HCHO]                                                                                                                                                |                | 481.1619[M+H-Glc] <sup>+</sup><br>319.1142[M+H-2Glc] <sup>+</sup>               | 6'-o-α-glucopyranosyl paeoniflorin                        |

|    |       |                                                   |                |                                                  |                |                                                  |                                                                 |  |
|----|-------|---------------------------------------------------|----------------|--------------------------------------------------|----------------|--------------------------------------------------|-----------------------------------------------------------------|--|
|    |       |                                                   |                | 121.0288[BZ-H] <sup>-</sup>                      |                |                                                  |                                                                 |  |
| 26 | 3.333 | C <sub>9</sub> H <sub>10</sub> O <sub>3</sub>     | 165.0549(-1.8) | 150.0320[M-H-CH <sub>3</sub> ] <sup>-</sup>      | 167.0702(-3.6) | 149.0600[M+H-H <sub>2</sub> O] <sup>+</sup>      | Phloretic acid                                                  |  |
|    |       |                                                   |                | 137.0237[M-H-CO] <sup>-</sup>                    |                | 121.0285[M+H-HCOOH] <sup>+</sup>                 |                                                                 |  |
| 27 | 3.378 | C <sub>30</sub> H <sub>32</sub> O <sub>15</sub>   | 631.1653(-1.6) | 495.1494[M-H-MB] <sup>-</sup>                    |                | 315.0723[MG+H] <sup>+</sup>                      | Galloylpaconiflorin or its isomer                               |  |
|    |       |                                                   |                | 313.0561[MG-H] <sup>-</sup>                      |                | 153.0184[GA+H-H <sub>2</sub> O] <sup>+</sup>     |                                                                 |  |
|    |       |                                                   |                | 169.0133[GA-H] <sup>-</sup>                      |                |                                                  |                                                                 |  |
| 28 | 3.430 | C <sub>34</sub> H <sub>28</sub> O <sub>22</sub>   | 787.0996(0.3)  | 635.0877[M-H-GA+H <sub>2</sub> O] <sup>-</sup>   |                | 771.1032[M+H-H <sub>2</sub> O] <sup>+</sup>      | 1,2,3,6-tetra-o-galloyl-β-D-glucose                             |  |
|    |       |                                                   |                | 465.0655[M-H-2GA+H <sub>2</sub> O] <sup>-</sup>  |                | 619.0950[M+H-GA] <sup>+</sup>                    |                                                                 |  |
|    |       |                                                   |                | -                                                |                |                                                  |                                                                 |  |
|    |       |                                                   |                | 449.1075[M-H-2GA] <sup>-</sup>                   |                | 153.0184[GA+H-H <sub>2</sub> O] <sup>+</sup>     |                                                                 |  |
|    |       |                                                   |                | 313.0581[M-H-3GA+2H <sub>2</sub> O] <sup>-</sup> |                |                                                  |                                                                 |  |
|    |       |                                                   |                | 169.0139[GA-H] <sup>-</sup>                      |                |                                                  |                                                                 |  |
| 29 | 3.527 | C <sub>18</sub> H <sub>24</sub> O <sub>11</sub>   | 415.1237(-0.7) | 327.1067[M-H-2CO <sub>2</sub> ] <sup>-</sup>     |                | 267.0866[M+H-Arab] <sup>+</sup>                  | 2-o-[α-arabinopyranosyl-(1-6)-β-D-glucopyranoside]-Benzaldehyde |  |
|    |       |                                                   |                | 121.0287[BH-H] <sup>-</sup>                      |                |                                                  |                                                                 |  |
| 30 | 3.578 | C <sub>30</sub> H <sub>32</sub> O <sub>17</sub> S | 695.1267(-2.2) | 543.1160[M-H-GA+H <sub>2</sub> O] <sup>-</sup>   |                | 315.0689[GA+Glc-H <sub>2</sub> O+H] <sup>+</sup> | Galloylpaconiflorin sulfonate                                   |  |
|    |       |                                                   |                | 313.0591[GA+Glc-H <sub>2</sub> O-H] <sup>-</sup> |                |                                                  |                                                                 |  |
| 31 | 3.647 | C <sub>23</sub> H <sub>28</sub> O <sub>11</sub>   | 479.1553(0.0)  | 435.1650[M-H-CO <sub>2</sub> ] <sup>-</sup>      | 481.1715(1.0)  | 463.1615[M+H-H <sub>2</sub> O] <sup>+</sup>      | Albiflorin                                                      |  |
|    |       |                                                   |                | 357.1184[M-H-BZ] <sup>-</sup>                    |                | 319.1186[M+H-Glc] <sup>+</sup>                   |                                                                 |  |
|    |       |                                                   |                | 327.1082[M-H-CH <sub>2</sub> O-BZ] <sup>-</sup>  |                | 301.1080[M+H-Glc-H <sub>2</sub> O] <sup>+</sup>  |                                                                 |  |
|    |       |                                                   |                | 317.1027[M-H-Glc] <sup>-</sup>                   |                |                                                  |                                                                 |  |

|    |       |                                                 |                |                                                                                                                                                                                                                                  |                |                                                                                                                                             |                                     |
|----|-------|-------------------------------------------------|----------------|----------------------------------------------------------------------------------------------------------------------------------------------------------------------------------------------------------------------------------|----------------|---------------------------------------------------------------------------------------------------------------------------------------------|-------------------------------------|
| 32 | 3.944 | C <sub>23</sub> H <sub>28</sub> O <sub>11</sub> | 479.1553(0.0)  | 121.0291[BZ-H] <sup>-</sup><br>449.1448[M-H-HCHO] <sup>-</sup><br>357.1186[M-H-BZ] <sup>-</sup><br>327.1080[M-H-CH <sub>2</sub> O-BZ] <sup>-</sup>                                                                               |                | 463.1604[M+H-H <sub>2</sub> O] <sup>+</sup><br>301.1075[M+H-Glc-H <sub>2</sub> O+H] <sup>+</sup>                                            | Paeoniflorin                        |
| 33 | 4.093 | C <sub>34</sub> H <sub>28</sub> O <sub>22</sub> | 787.0984(-1.3) | 121.0292[BZ-H] <sup>-</sup><br>617.0774[M-H-GA] <sup>-</sup>                                                                                                                                                                     |                | 619.0937[M+H-GA] <sup>+</sup>                                                                                                               | 1,3,4,6-tetra-o-galloyl-β-D-glucose |
| 34 | 4.127 | C <sub>21</sub> H <sub>22</sub> O <sub>10</sub> | 433.1132(-0.7) | 449.1446[M-H-2GA] <sup>-</sup><br>169.0139[GA-H] <sup>-</sup><br>271.0613[M-H-Glc] <sup>-</sup><br>255.0657[M-H-Glc-OH] <sup>-</sup>                                                                                             |                | 449.0680[M+H-2GA] <sup>+</sup><br>153.0181[GA+H-H <sub>2</sub> O] <sup>+</sup><br>273.0760[M+H-Glc] <sup>+</sup>                            | 5-hydroxyliquiritin                 |
| 35 | 4.131 | C <sub>14</sub> H <sub>6</sub> O <sub>8</sub>   | 300.9989(1.7)  | 243.8993[M-H-CO-HCHO]<br>] <sup>-</sup><br>225.9262[M-H-H <sub>2</sub> O-CO-H<br>CHO] <sup>-</sup><br>222.8290[M-H-CO <sub>2</sub> -2OH] <sup>-</sup>                                                                            |                | 287.8913[M+H-CH <sub>3</sub> ] <sup>+</sup><br>241.8830[M+H-CO <sub>2</sub> -OH] <sup>+</sup>                                               | Ellagic acid                        |
| 36 | 4.207 | C <sub>27</sub> H <sub>30</sub> O <sub>14</sub> | 577.1565(1.4)  | 517.1263[M-H-C <sub>2</sub> H <sub>4</sub> O <sub>2</sub> ] <sup>-</sup><br>487.1241[M-H-C <sub>3</sub> H <sub>6</sub> O <sub>3</sub> ] <sup>-</sup><br>457.1148[M-H-C <sub>4</sub> H <sub>8</sub> O <sub>4</sub> ] <sup>-</sup> | 579.1732(3.1)  | 561.1618[M+H-H <sub>2</sub> O] <sup>+</sup><br>543.1476[M+H-2H <sub>2</sub> O] <sup>+</sup><br>525.1397[M+H-3H <sub>2</sub> O] <sup>+</sup> | Isoviolanthin                       |
| 37 | 4.327 | C <sub>26</sub> H <sub>30</sub> O <sub>13</sub> | 549.1614(1.1)  | 417.1184[M-H-Api] <sup>-</sup><br>255.0661[M-H-Api-Glc] <sup>-</sup><br>135.0083[M-H-Api-Glc-V<br>P] <sup>-</sup>                                                                                                                | 551.1766(0.2)  | 257.0817[M+H-Api-Glc] <sup>+</sup><br>419.1335[M+H-Api] <sup>+</sup><br>137.0237[M+H-Api-Glc-VP] <sup>+</sup>                               | Liquiritin apioside                 |
| 38 | 4.407 | C <sub>21</sub> H <sub>22</sub> O <sub>9</sub>  | 417.1187(0.2)  | 255.0660[M-H-Glc] <sup>-</sup><br>135.0083[M-H-VP] <sup>-</sup>                                                                                                                                                                  | 419.1335(-1.7) | 257.0814[M+H-Glc] <sup>+</sup><br>137.0235[M+H-VP] <sup>+</sup>                                                                             | liquiritin                          |
| 39 | 4.493 | C <sub>41</sub> H <sub>32</sub> O <sub>26</sub> | 939.1093(-1.2) | 769.0878[M-H-GA] <sup>-</sup>                                                                                                                                                                                                    |                | 771.0992[M+H-GA] <sup>+</sup>                                                                                                               | Pentagalloylglucose                 |

|    |       |                                                 |               |                                                                                                                                                                                                      |                |                                                                                                                                                                                                                                           |                                                                                                |
|----|-------|-------------------------------------------------|---------------|------------------------------------------------------------------------------------------------------------------------------------------------------------------------------------------------------|----------------|-------------------------------------------------------------------------------------------------------------------------------------------------------------------------------------------------------------------------------------------|------------------------------------------------------------------------------------------------|
|    |       |                                                 |               | 617.0768[M-H-2GA+H <sub>2</sub> O]<br>-                                                                                                                                                              |                | 431.0567[M+H-3GA] <sup>+</sup>                                                                                                                                                                                                            |                                                                                                |
| 40 | 4.573 | C <sub>30</sub> H <sub>32</sub> O <sub>15</sub> | 631.1666(0.5) | 169.0136[GA-H] <sup>-</sup><br>479.1559[M-H-GA+H <sub>2</sub> O] <sup>-</sup><br>465.1393[M-H-BZ-CO <sub>2</sub> ] <sup>-</sup>                                                                      | 633.1809(-1.6) | 153.0184[GA+H-H <sub>2</sub> O] <sup>+</sup><br>503.1543[M+Na-GA+H <sub>2</sub> O] <sup>+</sup><br>319.1180[M+H-GA+H <sub>2</sub> O-Glc]<br>J <sup>+</sup>                                                                                | Galloylpaconiflorin                                                                            |
| 41 | 4.642 | C <sub>30</sub> H <sub>32</sub> O <sub>15</sub> | 631.1666(0.5) | 313.0557[GA+Glc-H <sub>2</sub> O-H]<br>-                                                                                                                                                             |                | 153.0185[GA+H-H <sub>2</sub> O] <sup>+</sup>                                                                                                                                                                                              |                                                                                                |
| 41 | 4.642 | C <sub>30</sub> H <sub>32</sub> O <sub>15</sub> | 631.1666(0.5) | 613.1561[M-H-H <sub>2</sub> O] <sup>-</sup><br>491.1195[M-H-H <sub>2</sub> O-BZ] <sup>-</sup><br>449.1448[M-H-GA-HCHO<br>+H <sub>2</sub> O] <sup>-</sup><br>313.0563[GA+Glc-H <sub>2</sub> O-H]<br>- |                | 615.1668[M+H-H <sub>2</sub> O] <sup>+</sup><br>493.1360[M+H-H <sub>2</sub> O-BZ] <sup>+</sup><br>315.0717[GA+Glc-H <sub>2</sub> O+H] <sup>+</sup>                                                                                         | 4'-o-galloylpaconiflorin                                                                       |
| 42 | 4.773 | C <sub>33</sub> H <sub>38</sub> O <sub>18</sub> | 721.1987(1.0) | 631.1658[M-H-C <sub>3</sub> H <sub>6</sub> O <sub>3</sub> ] <sup>-</sup><br><br>463.2186[M-H-2C <sub>4</sub> H <sub>8</sub> O <sub>4</sub> -H<br><sub>2</sub> O] <sup>-</sup>                        | 723.2150(1.9)  | 705.2054[M+H-H <sub>2</sub> O] <sup>+</sup><br><br>687.2048[M+H-2H <sub>2</sub> O] <sup>+</sup>                                                                                                                                           | Apigenin-6-C-α-L-rhamnopyranoside-8-C-[6'''-(3-hydroxy-3-methylglutaroyl)-β-D-glucopyranoside] |
| 43 | 4.825 | C <sub>30</sub> H <sub>32</sub> O <sub>15</sub> | 631.1664(0.2) | 479.1554[M-H-GA+H <sub>2</sub> O] <sup>-</sup><br>449.1449[M-H-GA-HCHO<br>+H <sub>2</sub> O] <sup>-</sup><br>169.0139[GA-H] <sup>-</sup>                                                             | 633.1827(1.3)  | 669.1925[M+H-3H <sub>2</sub> O] <sup>+</sup><br>487.2126[M-HM-C <sub>3</sub> H <sub>6</sub> O <sub>3</sub> +H] <sup>+</sup><br>503.1547[M+Na-GA+H <sub>2</sub> O] <sup>+</sup><br>319.1184[M+H-GA+H <sub>2</sub> O-Glc]<br>J <sup>+</sup> | 6'-o-galloylbiflorin                                                                           |
| 44 | 5.019 | C <sub>30</sub> H <sub>32</sub> O <sub>15</sub> | 631.1668(0.8) | 479.1561[M-H-GA+H <sub>2</sub> O] <sup>-</sup>                                                                                                                                                       | 633.1823(0.6)  | 153.0189[GA-H <sub>2</sub> O+H] <sup>+</sup><br>471.1298[M+H-Glc] <sup>+</sup>                                                                                                                                                            | 4-o-galloylbiflorin                                                                            |

|    |       |                                                 |                |                                                                         |                             |                                                          |                                |
|----|-------|-------------------------------------------------|----------------|-------------------------------------------------------------------------|-----------------------------|----------------------------------------------------------|--------------------------------|
|    |       |                                                 |                | 169.0138[GA-H] <sup>-</sup>                                             |                             | 301.1074[M+H-Glc-GA] <sup>+</sup>                        |                                |
| 45 | 5.236 | C <sub>21</sub> H <sub>22</sub> O <sub>10</sub> | 433.1133(-0.5) | 271.0603[M-H-Glc] <sup>-</sup>                                          |                             | 153.0187[GA-H <sub>2</sub> O+H] <sup>+</sup>             | Naringenin-7-o-β-D-glucoside   |
|    |       |                                                 |                | 151.0029[M-H-Glc-VP] <sup>-</sup>                                       |                             | 273.0754[M+H-Glc] <sup>+</sup>                           |                                |
| 46 | 5.568 | C <sub>26</sub> H <sub>30</sub> O <sub>13</sub> | 549.1616(1.5)  | 417.1185[M-H-Api] <sup>-</sup>                                          | 551.1766(0.2)               | 153.0186[M+H-Glc-VP] <sup>+</sup>                        | Isoliquiritin apioside         |
|    |       |                                                 |                | 255.0665[M-H-Api-Glc] <sup>-</sup>                                      |                             | 419.1333[M+H-Api] <sup>+</sup>                           |                                |
|    |       |                                                 |                | 135.0087[M-H-Api-Glc-V<br>P] <sup>-</sup>                               |                             | 257.0813[M+H-Api-Glc] <sup>+</sup>                       |                                |
| 47 | 5.602 | C <sub>23</sub> H <sub>28</sub> O <sub>11</sub> | 479.1559(1.3)  | 357.1192[M-H-BZ] <sup>-</sup>                                           | 481.1703(-1.5)              | 137.0233[M+H-Api-Glc-VP] <sup>+</sup>                    | Isopaeoniflorin                |
|    |       |                                                 |                | 327.1069[M-H-CH <sub>2</sub> O-BZ] <sup>-</sup>                         |                             | 319.1190[M+H-Glc] <sup>+</sup>                           |                                |
|    |       |                                                 |                | 121.0292[BZ-H] <sup>-</sup>                                             |                             | 301.1094[M+H-Glc-H <sub>2</sub> O] <sup>+</sup>          |                                |
| 48 | 5.619 | C <sub>37</sub> H <sub>36</sub> O <sub>19</sub> | 783.1761(-1.5) | 631.1647[M-H-GA+H <sub>2</sub> O] <sup>-</sup>                          | 785.1942(1.7)               | 503.1532[M+Na-2GA+2H <sub>2</sub> O] <sup>+</sup>        | 3',6'-di-O-galloylpaeoniflorin |
|    |       |                                                 |                | 479.1552[M-H-2GA+2H <sub>2</sub> O]<br>] <sup>-</sup>                   |                             | 481.1733[M+H-2GA+2H <sub>2</sub> O] <sup>+</sup>         |                                |
|    |       |                                                 |                | 313.0554[GA-H <sub>2</sub> O+Glc-H]<br>-<br>169.0133[GA-H] <sup>-</sup> |                             | 319.1193[M+H-2GA+2H <sub>2</sub> O-G<br>lc] <sup>+</sup> |                                |
| 49 | 5.655 | C <sub>48</sub> H <sub>74</sub> O <sub>21</sub> | 985.4636(-0.8) | 954.6343[M-H-OCH <sub>3</sub> ] <sup>-</sup> ;                          | 987.4797(-0.4)              | 301.1072[M+H-2GA+H <sub>2</sub> O-Gl<br>c] <sup>+</sup>  | Yunganoside G1                 |
|    |       |                                                 |                | 821.3953[M-H-Rha-H <sub>2</sub> O] <sup>-</sup>                         |                             | 841.4497[M+H-Rha] <sup>+</sup>                           |                                |
| 50 | 5.682 | C <sub>21</sub> H <sub>36</sub> O <sub>11</sub> | 463.2187(1.7)  | 331.1761[M-H-Api] <sup>-</sup>                                          | 487.2132[M+Na] <sup>+</sup> | 823.2448[M+H-Rha-H <sub>2</sub> O] <sup>+</sup>          | Zansiumaloside A               |
| 51 | 5.734 | C <sub>26</sub> H <sub>30</sub> O <sub>13</sub> | 549.1608(0.0)  | 417.1183[M-H-Api] <sup>-</sup>                                          |                             | 333.1894[M+H-Api] <sup>+</sup>                           | Licuraside                     |
|    |       |                                                 |                | 255.0657[M-H-Api-Glc] <sup>-</sup>                                      |                             | 257.0813[M+H-Api-Glc] <sup>+</sup>                       |                                |
|    |       |                                                 |                | 135.0083[M-H-Api-Glc-V<br>P] <sup>-</sup>                               |                             | 419.1342[M+H-Api] <sup>+</sup>                           |                                |
|    |       |                                                 |                |                                                                         |                             | 137.0237[M+H-Api-Glc-VP] <sup>+</sup>                    |                                |



|    |       |                                                 |                |                                                                                                                                                               |                |                                                                                                                                                                 |                                                         |
|----|-------|-------------------------------------------------|----------------|---------------------------------------------------------------------------------------------------------------------------------------------------------------|----------------|-----------------------------------------------------------------------------------------------------------------------------------------------------------------|---------------------------------------------------------|
| 52 | 5.785 | C <sub>21</sub> H <sub>22</sub> O <sub>9</sub>  | 417.1184(-0.5) | 255.0658[M-H-Glc] <sup>-</sup><br>135.0082[M-H-Glc-VP] <sup>-</sup>                                                                                           | 419.1326(-3.8) | 257.0817[M+H-Glc] <sup>+</sup><br>137.0237[M+H-VP-Glc] <sup>+</sup>                                                                                             | Isoliquiritin                                           |
| 53 | 5.882 | C <sub>16</sub> H <sub>12</sub> O <sub>4</sub>  | 267.0665(3.0)  | 252.0400[M-H-CH <sub>3</sub> ] <sup>-</sup>                                                                                                                   | 269.0813(-0.4) | 254.0460[M+H-CH <sub>3</sub> ] <sup>+</sup><br>237.0555[M+H-CH <sub>3</sub> OH] <sup>+</sup><br>201.0464[M+H-CH <sub>3</sub> OH-2H <sub>2</sub> O] <sup>+</sup> | Pallidiflorin                                           |
| 54 | 5.951 | C <sub>21</sub> H <sub>22</sub> O <sub>9</sub>  | 417.1172(-3.4) | 255.0655[M-H-Glc] <sup>-</sup><br>135.0080[M-H-VP-Glc] <sup>-</sup>                                                                                           | 419.1335(-1.7) | 257.0816[M+H-Glc] <sup>+</sup><br>137.0238[M+H-VP-Glc] <sup>+</sup>                                                                                             | Neoisoliquiritin                                        |
| 55 | 5.968 | C <sub>35</sub> H <sub>36</sub> O <sub>15</sub> | 695.1976(0.0)  | 549.1603[M-H-PC] <sup>-</sup><br>531.1499[M-H-PC-H <sub>2</sub> O] <sup>-</sup><br>417.1186[M-H-PC-Api] <sup>-</sup><br>255.0657[M-H-PC-Api-Glc] <sup>-</sup> |                | 419.1347[M+H-PC-Api] <sup>+</sup><br>257.0817[M+H-PC-Api-Glc] <sup>+</sup>                                                                                      | Licorice-glycoside D2 or its isomer                     |
| 56 | 6.014 | C <sub>48</sub> H <sub>74</sub> O <sub>20</sub> | 969.4691(-0.4) | 793.4326[M-H-GlcA] <sup>-</sup><br>497.1135[Rha+2GlcA-H] <sup>-</sup>                                                                                         |                | 795.4532[M+H-GlcA] <sup>+</sup><br>601.4107[M-2GlcA-H <sub>2</sub> O+H] <sup>+</sup>                                                                            | 3-o-[β-D-rhamnose]-24-hydroxyl-glycyrrhizic acid isomer |
| 57 | 6.031 | C <sub>22</sub> H <sub>22</sub> O <sub>9</sub>  |                | 267.0654[M-H-Glc] <sup>-</sup><br>252.0420[M-H-Glc-CH <sub>3</sub> ] <sup>-</sup>                                                                             | 431.1331(-2.6) | 269.0814[M+H-Glc] <sup>+</sup><br>254.0569[M+H-Glc-CH <sub>3</sub> ] <sup>+</sup>                                                                               | Ononin                                                  |
| 58 | 6.065 | C <sub>36</sub> H <sub>38</sub> O <sub>16</sub> | 725.2077(-0.7) | 549.1597[M-H-PM] <sup>-</sup><br>531.1508[M-H-PM-H <sub>2</sub> O] <sup>-</sup><br>255.0656[M-H-PM-Api-Glc] <sup>-</sup>                                      |                |                                                                                                                                                                 | Licorice glycoside A                                    |
| 59 | 6.214 | C <sub>15</sub> H <sub>12</sub> O <sub>4</sub>  | 255.0650(-2.7) | 135.0080[M-H-VP]                                                                                                                                              | 257.0809(-1.9) | 137.0238[M+H-VP] <sup>+</sup><br>147.0455[M+H-RL] <sup>+</sup><br>119.0504[M+H-RL-CO] <sup>+</sup>                                                              | Liquiritigenin                                          |

|    |       |                                                 |                |                                                                                                                                                               |                |                                                                                                                                                                    |                                     |
|----|-------|-------------------------------------------------|----------------|---------------------------------------------------------------------------------------------------------------------------------------------------------------|----------------|--------------------------------------------------------------------------------------------------------------------------------------------------------------------|-------------------------------------|
| 60 | 6.300 | C <sub>42</sub> H <sub>62</sub> O <sub>18</sub> | 853.3873(1.8)  | 351.0569[2GlcA-H] <sup>-</sup>                                                                                                                                | 855.4020(0.7)  | 765.4501[M+H-HCOOH-CO <sub>2</sub> ] <sup>+</sup><br>601.4045[M+H-GlcA-HCOOH-CH <sub>3</sub> OH] <sup>+</sup><br>485.3323[M+H-2GlcA-H <sub>2</sub> O] <sup>+</sup> | 22-Hydroxyl-licorice-saponin G2     |
| 61 | 6.380 | C <sub>16</sub> H <sub>12</sub> O <sub>6</sub>  | 299.0568(4.0)  | 255.0673[M-H-CO <sub>2</sub> ] <sup>-</sup>                                                                                                                   | 301.0716(1.3)  | 270.8882[M+H-OCH <sub>3</sub> ] <sup>+</sup><br>257.0803[M+H-CO <sub>2</sub> ] <sup>+</sup>                                                                        | Kaempferol 3-o-methyl ether         |
| 62 | 6.431 | C <sub>35</sub> H <sub>36</sub> O <sub>15</sub> | 695.1968(-1.2) | 549.1606[M-H-PC] <sup>-</sup><br>531.1500[M-H-PC-H <sub>2</sub> O] <sup>-</sup><br>417.1193[M-H-PC-Api] <sup>-</sup><br>255.0653[M-H-PC-Api-Glc] <sup>-</sup> |                | 257.0812[M+H-PC-Api-Glc] <sup>+</sup><br>147.0442[M+H-PC-Api-Glc-R] <sup>+</sup>                                                                                   | Licorice-glycoside D2 or its isomer |
| 63 | 6.528 | C <sub>21</sub> H <sub>34</sub> O <sub>10</sub> | 445.2081(1.6)  | 313.1642[M-H-Api] <sup>-</sup><br>293.0873[Api+Glc-H] <sup>-</sup>                                                                                            |                | 429.1938[M+H-H <sub>2</sub> O] <sup>+</sup>                                                                                                                        | (1S,5R)-β-pinene-10-β-vicianoside   |
| 64 | 6.528 | C <sub>30</sub> H <sub>32</sub> O <sub>13</sub> | 599.1766(0.2)  | 477.1406[M-H-BZ] <sup>-</sup><br>283.0605[BZ+Glc-H] <sup>-</sup><br>137.0241[4-OH-BZ-H] <sup>-</sup>                                                          |                | 285.0762[BZ+Glc+H] <sup>+</sup>                                                                                                                                    | Benzoyloxypaeoniflorin              |
| 65 | 6.606 | C <sub>42</sub> H <sub>64</sub> O <sub>16</sub> | 823.4105(-1.3) | 351.0581[2GlcA-H] <sup>-</sup>                                                                                                                                | 825.4235(-4.6) | 649.3922[M+H-GlcA] <sup>+</sup><br>585.4132[M+H-HCOOH-H <sub>2</sub> O] <sup>+</sup>                                                                               | Licorice-saponin J2                 |
| 66 | 6.745 | C <sub>35</sub> H <sub>36</sub> O <sub>15</sub> | 695.1981(0.7)  | 549.1617[M-H-PC] <sup>-</sup><br>531.1511[M-H-PC-H <sub>2</sub> O] <sup>-</sup><br>255.0660[M-H-PC-Api-Glc] <sup>-</sup>                                      |                | 257.0822[M+H-PC-Api-Glc] <sup>+</sup>                                                                                                                              | Licorice glycoside B                |

|    |       |                                                 |                |                                                                                                           |                 |                                                                                                                                                                                                                  |                                 |
|----|-------|-------------------------------------------------|----------------|-----------------------------------------------------------------------------------------------------------|-----------------|------------------------------------------------------------------------------------------------------------------------------------------------------------------------------------------------------------------|---------------------------------|
| 67 | 6.713 | C <sub>42</sub> H <sub>64</sub> O <sub>16</sub> | 823.4116(0.0)  | c]<br>351.0570[2GlcA-H] <sup>-</sup>                                                                      |                 | 649.3967[M+H-GlcA] <sup>+</sup><br>455.3535[M+H-2GlcA-H <sub>2</sub> O] <sup>+</sup>                                                                                                                             | Uralsaponin C                   |
| 68 | 6.789 | C <sub>42</sub> H <sub>62</sub> O <sub>17</sub> | 837.3875(-4.1) | 351.0562 [2GlcA-H] <sup>-</sup> ,<br>289.0730<br>[2GlcA-H <sub>2</sub> O-CO <sub>2</sub> -H] <sup>-</sup> | 839.4051(-1.7)  | 663.3754[M+H-GlcA] <sup>+</sup><br>487.3426[M+H-2GlcA] <sup>+</sup><br><br>469.3330[M+H-2GlcA-H <sub>2</sub> O] <sup>+</sup>                                                                                     | 24-Hydroxyl-glycyrrhizin        |
| 69 | 6.843 | C <sub>48</sub> H <sub>72</sub> O <sub>22</sub> | 999.4428(-0.9) | 837.3889[M-H-Glc] <sup>-</sup><br>351.0555[2GlcA-H] <sup>-</sup>                                          | 1001.4576(-1.7) | 825.4209[M+H-GlcA] <sup>+</sup><br>649.3965[M+H-2GlcA] <sup>+</sup><br>631.3855[M+H-2GlcA-H <sub>2</sub> O] <sup>+</sup><br>487.3429[M+H-2GlcA-Glc] <sup>+</sup><br>469.3321[M+H-2GlcA-Glc-H<br>2O] <sup>+</sup> | 24-Hydroxyl-licoricesaponinA3   |
| 70 | 7.060 | C <sub>44</sub> H <sub>64</sub> O <sub>19</sub> | 895.3948(-1.8) | 351.0562[2GlcA-H] <sup>-</sup>                                                                            |                 | 545.3487[M+H-2GlcA] <sup>+</sup><br>527.3367[M+H-2GlcA-H <sub>2</sub> O] <sup>+</sup>                                                                                                                            | Uralsaponin F                   |
| 71 | 7.226 | C <sub>42</sub> H <sub>62</sub> O <sub>18</sub> | 853.3848(-1.2) | 351.0561[2GlcA-H] <sup>-</sup>                                                                            | 855.4004(-1.2)  | 503.3370[M+H-2GlcA] <sup>+</sup><br>485.3263[M+H-2GlcA-H <sub>2</sub> O] <sup>+</sup><br>467.3147[M+H-2GlcA-2H <sub>2</sub> O]<br>+                                                                              | 22-Hydroxyl-licorice-saponin G2 |
| 72 | 7.340 | C <sub>48</sub> H <sub>72</sub> O <sub>21</sub> | 983.4476(-1.2) | 821.3977[M-H-Glc] <sup>-</sup><br>351.0550[2GlcA-H] <sup>-</sup>                                          | 985.4650(0.6)   | 809.4406[M+H-GlcA] <sup>+</sup><br>615.3862[M+H-GlcA-H <sub>2</sub> O] <sup>+</sup><br>453.3372[M+H-2GlcA-Glc-H <sub>2</sub><br>O] <sup>+</sup>                                                                  | Licorice saponin A3             |
| 73 | 7.391 | C <sub>30</sub> H <sub>32</sub> O <sub>12</sub> | 583.1817(0.2)  | 461.1450[M-H-BZ] <sup>-</sup><br>121.0291[BZ-H] <sup>-</sup>                                              |                 | 445.1501[M+H-BZ-H <sub>2</sub> O] <sup>+</sup><br>427.1391[M+H-BZ-2H <sub>2</sub> O] <sup>+</sup><br>301.1074[M+H-BZ-Glc] <sup>+</sup>                                                                           | Benzoylpaconiflorin             |

|    |       |                                                 |                |                                                                                                                                               |                |                                                                                                                                                                                                                                                         |                                                  |
|----|-------|-------------------------------------------------|----------------|-----------------------------------------------------------------------------------------------------------------------------------------------|----------------|---------------------------------------------------------------------------------------------------------------------------------------------------------------------------------------------------------------------------------------------------------|--------------------------------------------------|
| 74 | 7.540 | C <sub>30</sub> H <sub>32</sub> O <sub>12</sub> | 583.1812(-0.7) | 121.0289[BZ-H] <sup>-</sup>                                                                                                                   | 585.1970(-0.3) | 267.0871[BZ+ Glc-H <sub>2</sub> O+H] <sup>+</sup><br>319.1181[M+NA-BZ-Glc-CO <sub>2</sub> ] <sup>+</sup><br>301.1076[M+H-BZ-Glc] <sup>+</sup><br>267.0871[BZ+ Glc-H <sub>2</sub> O+H] <sup>+</sup><br>249.0764[BZ+Glc-2H <sub>2</sub> O+H] <sup>+</sup> | Isobenzoylpaconiflorin                           |
| 75 | 7.626 | C <sub>44</sub> H <sub>64</sub> O <sub>18</sub> | 879.4022(0.9)  | 351.0559[2GlcA-H] <sup>-</sup>                                                                                                                |                | 705.3859[M+H-GlcA] <sup>+</sup><br>511.3423[M+H-2GlcA-H <sub>2</sub> O] <sup>+</sup><br>451.3203[M+H-2GlcA-H <sub>2</sub> O-AceOH] <sup>+</sup>                                                                                                         | 22-Acetoxyglycyrrhizin                           |
| 76 | 7.854 | C <sub>42</sub> H <sub>62</sub> O <sub>17</sub> | 837.3898(-1.3) | 661.3580[M-H-GlcA] <sup>-</sup><br>351.0556[2GlcA-H] <sup>-</sup>                                                                             | 839.4050(-1.8) | 663.3726[M+H-GlcA] <sup>+</sup><br>469.3322[M +H-2GlcA-H <sub>2</sub> O] <sup>+</sup>                                                                                                                                                                   | Isolicorice saponin G2                           |
| 77 | 7.969 | C <sub>42</sub> H <sub>62</sub> O <sub>17</sub> | 837.3915(0.7)  | 351.0585[M-H-2GlcA] <sup>-</sup>                                                                                                              | 839.4075(1.2)  | 663.3738[M+H-GlcA] <sup>+</sup> ,<br>487.3447[M+H-2GlcA] <sup>+</sup> ,<br>469.3324[M+H-2GlcA-H <sub>2</sub> O] <sup>+</sup>                                                                                                                            | Yunganoside K2                                   |
| 78 | 8.003 | C <sub>48</sub> H <sub>74</sub> O <sub>20</sub> | 969.4692(-0.3) | 823.4121[M-H-Rha] <sup>-</sup><br><br>497.1143[2GlcA+Rha-H] <sup>-</sup>                                                                      |                | 825.4094[M+H-Rha] <sup>+</sup><br><br>795.4512[M+H-GlcA] <sup>+</sup>                                                                                                                                                                                   | 3-o-[β-D-rhamnose]-24-hydroxyl-glycyrrhizic acid |
| 79 | 8.224 | C <sub>15</sub> H <sub>12</sub> O <sub>4</sub>  | 255.0673(1.6)  | 135.0092[M-H-VP] <sup>-</sup><br>119.0509[VP-H] <sup>-</sup>                                                                                  |                | 147.0465[M+H-RL] <sup>+</sup><br>137.0249[M+H-VP] <sup>+</sup>                                                                                                                                                                                          | Isoliquiritigenin                                |
| 80 | 8.500 | C <sub>42</sub> H <sub>62</sub> O <sub>17</sub> | 837.3906(-0.4) | 819.3802[M-H-H <sub>2</sub> O] <sup>-</sup><br>775.3896[M-H-H <sub>2</sub> O-CO <sub>2</sub> ] <sup>-</sup><br>351.0566[2GlcA-H] <sup>-</sup> | 839.4058(-0.8) | 663.3759[M+H-GlcA] <sup>+</sup><br>487.3425[M+H-2GlcA] <sup>+</sup><br>469.3321[M+H-2GlcA-H <sub>2</sub> O] <sup>+</sup><br>451.3215[M+H-2GlcA-2H <sub>2</sub> O] <sup>+</sup>                                                                          | Licorice saponin G2                              |
| 81 | 8.586 | C <sub>16</sub> H <sub>12</sub> O <sub>4</sub>  | 266.0667(2.7)  | 252.0426[M-H-CH <sub>3</sub> ] <sup>-</sup>                                                                                                   | 269.0826(4.5)  | 237.0558[M+H-CH <sub>3</sub> OH] <sup>+</sup>                                                                                                                                                                                                           | Formononetin                                     |

|    |       |                                                 |                |                                                            |                             |                                                       |                                                                                              |
|----|-------|-------------------------------------------------|----------------|------------------------------------------------------------|-----------------------------|-------------------------------------------------------|----------------------------------------------------------------------------------------------|
|    |       |                                                 |                | 224.0464[M-H-CH <sub>3</sub> -CO] <sup>-</sup>             |                             | 226.0627[M+H-CH <sub>3</sub> -CO] <sup>+</sup>        |                                                                                              |
|    |       |                                                 |                | 223.0409[M-H-CH <sub>3</sub> -CHO] <sup>-</sup>            |                             |                                                       |                                                                                              |
|    |       |                                                 |                | -                                                          |                             |                                                       |                                                                                              |
| 82 | 8.683 | C <sub>48</sub> H <sub>72</sub> O <sub>20</sub> | 967.4517(-2.3) | 351.0561[2GlcA-H] <sup>-</sup>                             |                             | 823.4158[M+H-Rha] <sup>+</sup>                        | Rhaoglycyrrhizin                                                                             |
|    |       |                                                 |                |                                                            |                             | 647.3723[M+H-Rha-GlcA] <sup>+</sup>                   |                                                                                              |
|    |       |                                                 |                |                                                            |                             | 471.3460[M+H-Rha-2GlcA] <sup>+</sup>                  |                                                                                              |
|    |       |                                                 |                |                                                            |                             | 453.3364[M+H-Rha-2GlcA-H <sub>2</sub> O] <sup>+</sup> |                                                                                              |
| 83 | 8.718 | C <sub>42</sub> H <sub>62</sub> O <sub>17</sub> | 837.3906(-0.4) | 661.3574[M-H]-GlcA] <sup>-</sup>                           |                             | 663.3690[M+H- GlcA] <sup>+</sup>                      | Macedonoside B                                                                               |
|    |       |                                                 |                | 351.0569[2GlcA-H] <sup>-</sup>                             |                             | 487.3421[M+H-2GlcA] <sup>+</sup>                      |                                                                                              |
|    |       |                                                 |                |                                                            |                             | 469.3312[M+H-2GlcA-H <sub>2</sub> O] <sup>+</sup>     |                                                                                              |
| 84 | 8.751 | C <sub>42</sub> H <sub>62</sub> O <sub>16</sub> |                | 351.0578[2GlcA-H] <sup>-</sup>                             | 823.4081(-4.3)              | 647.3756[M+H-GlcA] <sup>+</sup>                       | Licorice saponin H2                                                                          |
|    |       |                                                 |                |                                                            |                             | 471.3464[M+H-2GlcA] <sup>+</sup>                      |                                                                                              |
|    |       |                                                 |                |                                                            |                             | 453.3356[M+H-2GlcA-H <sub>2</sub> O] <sup>+</sup>     |                                                                                              |
| 85 | 8.786 | C <sub>44</sub> H <sub>64</sub> O <sub>17</sub> | 863.4056(-1.0) | 583.1813[M-H-GlcA-Ace<br>OH-CO <sub>2</sub> ] <sup>-</sup> | 865.4239(2.0)               | 689.3988[M+H-GlcA] <sup>+</sup>                       | 22-Acetoxy glycyrrhaldehyde                                                                  |
|    |       |                                                 |                | 351.0557[2GlcA-H] <sup>-</sup>                             |                             | 495.3459[M+H-2GlcA-H <sub>2</sub> O] <sup>+</sup>     |                                                                                              |
| 86 | 9.015 | C <sub>42</sub> H <sub>62</sub> O <sub>16</sub> | 821.3946(-1.7) | 645.3725[M-H-GlcA] <sup>-</sup>                            | 823.4142(3.2)               | 647.3801[M+H-GlcA] <sup>+</sup>                       | Glycyrrhizin                                                                                 |
|    |       |                                                 |                | 351.0559[2GlcA-H] <sup>-</sup>                             |                             | 453.3367[M+H-2GlcA-H <sub>2</sub> O] <sup>+</sup>     |                                                                                              |
|    |       |                                                 |                |                                                            |                             | 471.3483[M+H-2GlcA] <sup>+</sup>                      |                                                                                              |
| 87 | 9.215 | C <sub>25</sub> H <sub>32</sub> O <sub>9</sub>  | 475.1971(0.6)  | 415.1762[M-H-AceOH] <sup>-</sup>                           | 499.1912[M+Na] <sup>+</sup> | 417.1903[M+H-AceOH] <sup>+</sup>                      | 3,5-Diacetoxy-1-(4-hydroxy-3-met<br>hoxyphenyl)-7-(3,4-dihydroxy-5-<br>methoxyphenyl)heptane |
|    |       |                                                 |                | 355.1543[M-H-2AceOH] <sup>-</sup>                          |                             | 357.1695[M+H-2AceOH] <sup>+</sup>                     |                                                                                              |
|    |       |                                                 |                | 295.1696[M-H-PE] <sup>-</sup>                              |                             |                                                       |                                                                                              |
| 88 | 9.629 | C <sub>42</sub> H <sub>64</sub> O <sub>15</sub> | 807.4144(-2.8) | 631.3853[M-H-GlcA] <sup>-</sup>                            | 809.4285(-4.6)              | 633.3987[M+H-GlcA] <sup>+</sup> ,                     | 22-dehydroxyl uralsaponinC                                                                   |

|    |        |                                                 |                |                                                                                                                                                                                                    |                |                                                                                                                                     |                                                          |
|----|--------|-------------------------------------------------|----------------|----------------------------------------------------------------------------------------------------------------------------------------------------------------------------------------------------|----------------|-------------------------------------------------------------------------------------------------------------------------------------|----------------------------------------------------------|
|    |        |                                                 |                |                                                                                                                                                                                                    |                | 457.3666[M+H-2GlcA] <sup>+</sup><br>439.3572[M+H-2GlcA-H <sub>2</sub> O] <sup>+</sup><br>421.3664[M+H-2GlcA-2H <sub>2</sub> O]<br>+ |                                                          |
| 89 | 9.661  | C <sub>42</sub> H <sub>62</sub> O <sub>16</sub> | 821.3950(-1.2) | 351.0552[2GlcA-H] <sup>-</sup>                                                                                                                                                                     | 823.4147(3.7)  | 647.3833[M+H-GlcA] <sup>+</sup><br>471.3437[M+H-2GlcA] <sup>+</sup><br>453.3353[M+H-2GlcA-H <sub>2</sub> O] <sup>+</sup>            | 18α-glycyrrhizin                                         |
| 90 | 9.895  | C <sub>21</sub> H <sub>22</sub> O <sub>5</sub>  | 353.1382(-2.0) | 338.1149[M-CH <sub>3</sub> -H] <sup>-</sup><br>295.0597[M-H-2CH <sub>3</sub> -CO] <sup>-</sup>                                                                                                     | 355.1537(-2.3) | 299.0947[M+H-BT] <sup>+</sup><br>189.0934[M-H-MVD] <sup>+</sup>                                                                     | Licoagrochalcone D                                       |
| 91 | 9.924  | C <sub>42</sub> H <sub>62</sub> O <sub>16</sub> | 821.3934(-3.2) | 351.0574[2GlcA-H] <sup>-</sup>                                                                                                                                                                     | 823.4133(2.1)  | 647.3770[M+H-GlcA] <sup>+</sup><br>471.3464[M+H-2GlcA] <sup>+</sup><br>453.3368[M+H-2GlcA-H <sub>2</sub> O] <sup>+</sup>            | UralsaponinB                                             |
| 92 | 9.930  | C <sub>41</sub> H <sub>62</sub> O <sub>14</sub> | 777.4058(-0.4) | 627.3535[M-H-Arab-H <sub>2</sub> O] <sup>-</sup><br>449.1499[M-H-Arab-GlcA-H <sub>2</sub> O] <sup>-</sup>                                                                                          |                | 647.3787[M+H-Arab] <sup>+</sup><br>453.3366[M+H-Arab-GlcA-H <sub>2</sub> O] <sup>+</sup>                                            | Araboglycyrrhizin                                        |
| 93 | 10.021 | C <sub>20</sub> H <sub>16</sub> O <sub>6</sub>  | 351.0879(2.8)  | 283.0987[M-H-PA] <sup>-</sup>                                                                                                                                                                      | 353.1031(1.7)  | 335.0930[M+H-H <sub>2</sub> O] <sup>+</sup><br>311.0569[M+H-PP] <sup>+</sup>                                                        | LicoisoflavoneB/SemilicoisoflavoneB/allolicoisoflavone B |
| 94 | 10.247 | C <sub>20</sub> H <sub>18</sub> O <sub>6</sub>  | 353.1024(-0.3) | 297.0398[M-H-BT] <sup>-</sup>                                                                                                                                                                      | 355.1187(1.4)  | 299.0583[M+H-BT] <sup>+</sup>                                                                                                       | Licoflavonol or its isomer                               |
| 95 | 10.324 | C <sub>20</sub> H <sub>20</sub> O <sub>6</sub>  | 355.1185(0.8)  | 337.1077[M-H-H <sub>2</sub> O] <sup>-</sup><br>293.0453[M-H-CO-2OH] <sup>-</sup><br>281.0457[M-H-H <sub>2</sub> O-BT] <sup>-</sup><br>229.0868[M-H-BE] <sup>-</sup><br>125.0241[BE-H] <sup>-</sup> |                | 339.1212[M+H-H <sub>2</sub> O] <sup>+</sup><br>283.0604[M+H-H <sub>2</sub> O-BT] <sup>+</sup><br>301.0708[M+H-BT] <sup>+</sup>      | Uralenin                                                 |
| 96 | 10.410 | C <sub>21</sub> H <sub>20</sub> O <sub>6</sub>  | 367.1173(-2.5) | 339.1223[M-H-CO] <sup>-</sup><br>333.0754[M-H-2OH] <sup>-</sup>                                                                                                                                    | 369.1342(1.1)  | 335.0929[M+H-2OH] <sup>+</sup><br>313.0712[M+H-BT] <sup>+</sup>                                                                     | Glycyrrhisoflavanone                                     |

|     |        |                                                |                |                                                                                                                                 |                |                                                                                                                                                                                     |                            |  |
|-----|--------|------------------------------------------------|----------------|---------------------------------------------------------------------------------------------------------------------------------|----------------|-------------------------------------------------------------------------------------------------------------------------------------------------------------------------------------|----------------------------|--|
|     |        |                                                |                | 309.0397[M-H-CO-2CH <sub>3</sub> ] <sup>-</sup>                                                                                 |                |                                                                                                                                                                                     |                            |  |
|     |        |                                                |                | 297.0398[M-H-PI] <sup>-</sup>                                                                                                   |                |                                                                                                                                                                                     |                            |  |
| 97  | 10.483 | C <sub>21</sub> H <sub>20</sub> O <sub>6</sub> | 367.1192(2.7)  | 337.1081[M-H-CH <sub>2</sub> O] <sup>-</sup> ,<br>309.0408[M-H-CH <sub>2</sub> O-CO] <sup>-</sup>                               | 369.1342(1.1)  | 313.0718[M+H-IB] <sup>+</sup> ,<br>285.0764[M+H-BT-CO] <sup>+</sup> ,<br>269.0478[M+H-BT-CO-CH <sub>4</sub> ] <sup>+</sup>                                                          | Glycycomarin               |  |
| 98  | 10.623 | C <sub>21</sub> H <sub>24</sub> O <sub>5</sub> | 355.1549(1.1)  | 321.1107[M-H-2OH] <sup>-</sup><br>323.1283[M-H-CH <sub>4</sub> O] <sup>-</sup><br>337.1086[M-H-H <sub>2</sub> O] <sup>-</sup>   | 357.1712(2.8)  | 301.1091[M+H-BT] <sup>+</sup> ;<br>321.1140[M+H-2H <sub>2</sub> O] <sup>+</sup><br>313.1096[M+H-CO <sub>2</sub> ] <sup>+</sup>                                                      | Glyasperins C              |  |
| 99  | 10.777 | C <sub>20</sub> H <sub>18</sub> O <sub>6</sub> | 353.1022(-0.8) | 297.0396[M-H-BT] <sup>-</sup><br>269.0458[M-H-BT-CO] <sup>-</sup>                                                               | 355.1190(2.3)  | 299.0564[M+H-BT] <sup>+</sup> ,<br>287.0574[M+H-IP] <sup>+</sup>                                                                                                                    | Licoflavonol or its isomer |  |
| 100 | 11.022 | C <sub>20</sub> H <sub>18</sub> O <sub>6</sub> | 353.1020(-1.4) | 309.1120[M-H-CO <sub>2</sub> ] <sup>-</sup><br>285.1125[M-H-IP] <sup>-</sup>                                                    | 355.1194(3.4)  | 340.0794[M+H-CH <sub>3</sub> ] <sup>+</sup><br>299.0556[M+H-BT] <sup>+</sup>                                                                                                        | Licoflavonol or its isomer |  |
| 101 | 11.090 | C <sub>20</sub> H <sub>18</sub> O <sub>6</sub> | 353.1025(0.0)  | 307.0964[M-H-CO-H <sub>2</sub> O] <sup>-</sup><br>227.0707[M-H-BE] <sup>-</sup><br>125.0239[BE-H] <sup>-</sup>                  | 355.1183(0.3)  | 337.1064[M+H-H <sub>2</sub> O] <sup>+</sup><br>179.0342[M+H-DCO] <sup>+</sup>                                                                                                       | Licoisoflavanone           |  |
| 102 | 11.165 | C <sub>20</sub> H <sub>18</sub> O <sub>6</sub> | 353.1027(0.6)  | 325.1858[M-H-CO] <sup>-</sup>                                                                                                   | 355.1190(2.3)  | 299.0558[M+H-BT] <sup>+</sup><br>327.1252[M+H-CO] <sup>+</sup>                                                                                                                      | Licoflavonol or its isomer |  |
| 103 | 11.248 | C <sub>21</sub> H <sub>22</sub> O <sub>4</sub> | 337.1447(2.1)  | 281.0833[M-H-2CH <sub>3</sub> -C <sub>2</sub> H <sub>2</sub> ] <sup>-</sup><br>187.0768[M-H-2CH <sub>3</sub> -OCD] <sup>-</sup> | 339.1600(1.2)  | 271.0978[M+H-IP] <sup>+</sup><br>245.1198[M+H-PH] <sup>+</sup>                                                                                                                      | Licochalcone A             |  |
| 104 | 11.353 | C <sub>21</sub> H <sub>18</sub> O <sub>6</sub> | 365.1023(-0.5) | 337.1076[M-H-CO] <sup>-</sup><br>307.0236[M-H-CO-2CH <sub>3</sub> ] <sup>-</sup>                                                | 367.1172(-2.7) | 121.0299[M+H-MMEV] <sup>+</sup><br>339.1227[M+H-CO] <sup>+</sup><br>323.0545[M+H-CO <sub>2</sub> ] <sup>+</sup><br>311.0550[M+H-2CO] <sup>+</sup><br>283.0602[M+H-3CO] <sup>+</sup> | Isoglycyrol                |  |

|     |        |                                                |                |                                                                                                                                                              |                |                                                                                                                                                               |                  |
|-----|--------|------------------------------------------------|----------------|--------------------------------------------------------------------------------------------------------------------------------------------------------------|----------------|---------------------------------------------------------------------------------------------------------------------------------------------------------------|------------------|
| 105 | 11.370 | C <sub>25</sub> H <sub>26</sub> O <sub>7</sub> | 437.1595(-1.1) | 381.1332[M-H-BT] <sup>-</sup><br>337.1071[M-H-MPEO] <sup>-</sup><br>307.0240[M-H-MPEO-2C<br>H <sub>3</sub> ] <sup>-</sup>                                    | 439.1745(-2.7) | 383.1125[M+H-BT] <sup>+</sup>                                                                                                                                 | Kanzonol T       |
| 106 | 11.816 | C <sub>20</sub> H <sub>16</sub> O <sub>5</sub> | 335.0922(0.9)  | 320.0675[M-H-CH <sub>3</sub> ] <sup>-</sup><br>305.0450[M-H-2CH <sub>3</sub> ] <sup>-</sup><br>291.1021[M-H-CHO-CH <sub>3</sub> ] <sup>-</sup>               | 337.1076(0.0)  | 319.0964[M+H-H <sub>2</sub> O] <sup>+</sup><br>295.0607[M+H-PP] <sup>+</sup>                                                                                  | Glabrone         |
| 107 | 11.850 | C <sub>12</sub> H <sub>14</sub> O <sub>2</sub> |                |                                                                                                                                                              | 191.1074(1.0)  | 173.0964[M+H-H <sub>2</sub> O] <sup>+</sup><br>145.1011[M+H-HCOOH] <sup>+</sup><br>117.0699[M+H-HCOOH-C <sub>2</sub> H<br>4] <sup>+</sup>                     | Z-/E-ligustilide |
| 108 | 12.016 | C <sub>20</sub> H <sub>18</sub> O <sub>6</sub> | 353.1023(-0.6) | 323.1281[M-H-2CH <sub>3</sub> ] <sup>-</sup><br>269.0445[M-H-2DO] <sup>-</sup><br>241.0493[M-H-2DO-CO] <sup>-</sup>                                          | 355.1195(3.7)  | 299.0556[M+H-BT] <sup>+</sup>                                                                                                                                 | Glyasperin F     |
| 109 | 12.314 | C <sub>20</sub> H <sub>16</sub> O <sub>6</sub> | 351.0872(0.9)  | 336.0628[M-H-CH <sub>3</sub> ] <sup>-</sup><br>307.0968[M-H-CO <sub>2</sub> ] <sup>-</sup><br>283.0972[M-H-PA] <sup>-</sup><br>241.0862[M-H-RL] <sup>-</sup> | 353.1026(0.3)  | 335.0917[M+H-H <sub>2</sub> O] <sup>+</sup><br>311.0558[M+H-PP] <sup>+</sup><br>299.0558[M+H-3H <sub>2</sub> O] <sup>+</sup><br>283.0614[M+H-PI] <sup>+</sup> | Demethylglycyrol |
| 110 | 12.765 | C <sub>20</sub> H <sub>16</sub> O <sub>5</sub> | 335.0915(-1.2) | 317.0812[M-H-H <sub>2</sub> O] <sup>-</sup><br>305.0452[M-H-2CH <sub>3</sub> ] <sup>-</sup><br>291.0655[M-H-CO <sub>2</sub> ] <sup>-</sup>                   | 337.1074(-0.6) | 295.0581[M+H-PP] <sup>+</sup>                                                                                                                                 | Isoglabrone      |
| 111 | 12.879 | C <sub>25</sub> H <sub>28</sub> O <sub>4</sub> | 391.1915(1.5)  | 203.0716[M-H-MBV] <sup>-</sup><br>187.1129[MBV-H] <sup>-</sup><br>132.0577[MBV-BT-H] <sup>-</sup>                                                            | 393.2063(-0.8) | 337.1436[M+H-BT] <sup>+</sup>                                                                                                                                 | Glabrol          |
| 112 | 13.280 | C <sub>22</sub> H <sub>26</sub> O <sub>5</sub> | 369.1704(0.5)  | 339.1235[M-H-CH <sub>2</sub> O] <sup>-</sup><br>311.0923[M-H-CH <sub>2</sub> O-CO] <sup>-</sup>                                                              | 371.1841(-4.6) | 315.1224[M+H-BT] <sup>+</sup><br>235.1329[M+H-MLT] <sup>+</sup>                                                                                               | Glyasperins D    |



|     |        |                                                |                |                                                                    |                |                                                  |                                                 |
|-----|--------|------------------------------------------------|----------------|--------------------------------------------------------------------|----------------|--------------------------------------------------|-------------------------------------------------|
|     |        |                                                |                | 279.0654[M-H-CH <sub>2</sub> O-CO-CH <sub>3</sub> OH] <sup>-</sup> |                |                                                  |                                                 |
|     |        |                                                |                | 135.0449[M-H-DOT] <sup>-</sup>                                     |                |                                                  |                                                 |
| 113 | 13.394 | C <sub>25</sub> H <sub>28</sub> O <sub>6</sub> | 423.1821(3.1)  | 367.1166[M-H-BT] <sup>-</sup>                                      |                | 369.1359[M+H-BT] <sup>+</sup>                    | Glyinflanin F                                   |
|     |        |                                                |                | 229.0867[M-H-BF] <sup>-</sup>                                      |                | 365.1031[M+H-ISP] <sup>+</sup>                   |                                                 |
|     |        |                                                |                | 193.0867[BF-H] <sup>-</sup>                                        |                | 351.1235[M+H-ISD] <sup>+</sup>                   |                                                 |
|     |        |                                                |                |                                                                    |                | 221.1181[M+H-APP] <sup>+</sup>                   |                                                 |
|     |        |                                                |                |                                                                    |                | 191.1073[M+H-APP-2CH <sub>3</sub> ] <sup>+</sup> |                                                 |
| 114 | 13.577 | C <sub>25</sub> H <sub>28</sub> O <sub>5</sub> | 407.1862(1.0)  | 337.1442[M-H-PI] <sup>-</sup>                                      | 409.2012(-0.7) | 353.1389[M+H-BT] <sup>+</sup>                    | Glycyrdione A                                   |
|     |        |                                                |                | 219.0658[M-H-HMDB] <sup>-</sup>                                    |                | 191.1072[HMBB+H] <sup>+</sup>                    |                                                 |
|     |        |                                                |                | 187.1122[HMDB-H] <sup>-</sup>                                      |                |                                                  |                                                 |
| 115 | 13.708 | C <sub>25</sub> H <sub>26</sub> O <sub>6</sub> | 421.1647(-0.9) | 352.0945[M-H-C <sub>3</sub> H <sub>9</sub> ] <sup>-</sup>          | 423.1805(-0.7) | 367.1177[M+H-BT] <sup>+</sup>                    | 6,8-diprenylorobol                              |
|     |        |                                                |                | 309.0397[M-H-4CO] <sup>-</sup>                                     |                | 311.0555[M+H-2BT] <sup>+</sup>                   |                                                 |
|     |        |                                                |                |                                                                    |                | 261.1852[M+H-DCE] <sup>+</sup>                   |                                                 |
|     |        |                                                |                |                                                                    |                | 163.0756[DCE+H] <sup>+</sup>                     |                                                 |
| 116 | 13.743 | C <sub>24</sub> H <sub>28</sub> O <sub>4</sub> |                |                                                                    | 381.2065(-0.3) | 335.2004[M+H-H <sub>2</sub> O-CO] <sup>+</sup>   | Senkyunolide O or its isomer                    |
|     |        |                                                |                |                                                                    |                | 191.1071[M+H]-ZBD] <sup>+</sup>                  |                                                 |
|     |        |                                                |                |                                                                    |                | 173.0963[M+H-ZBD-H <sub>2</sub> O] <sup>+</sup>  |                                                 |
|     |        |                                                |                |                                                                    |                | 145.1013[M+H-ZBD-HCOO H] <sup>+</sup>            |                                                 |
| 117 | 13.908 | C <sub>25</sub> H <sub>28</sub> O <sub>6</sub> | 423.1799(-2.1) | 299.0861[M-H-MBT] <sup>-</sup>                                     | 425.1959(-1.2) | 369.1337[M+H-BT] <sup>+</sup>                    | GancaoninE/<br>3'-(γ,γ-dimethylallyl)-kievitone |
|     |        |                                                |                | 193.0862[MBT-H] <sup>-</sup>                                       |                | 191.1073[M+H-DMP] <sup>+</sup>                   |                                                 |
|     |        |                                                |                |                                                                    |                | 135.0443[M+H-DMP-BT] <sup>+</sup>                |                                                 |
| 118 | 14.040 | C <sub>25</sub> H <sub>26</sub> O <sub>6</sub> | 421.1646(-1.2) | 309.0398[M-H-2BT] <sup>-</sup>                                     | 423.1812(0.9)  | 367.1180[M+H-BT] <sup>+</sup>                    | Glyurallin B/Isoangustone A<br>/Angustone A     |

|     |        |                                                |                |                                                |                |                                                   |                                               |
|-----|--------|------------------------------------------------|----------------|------------------------------------------------|----------------|---------------------------------------------------|-----------------------------------------------|
|     |        |                                                |                |                                                |                | 311.0553[M+H-2BT] <sup>+</sup>                    |                                               |
|     |        |                                                |                |                                                |                | 283.0581[M+H-2BT-CO] <sup>+</sup>                 |                                               |
|     |        |                                                |                |                                                |                | 255.0659[M+H-2BT-2CO] <sup>+</sup>                |                                               |
| 119 | 14.537 | C <sub>30</sub> H <sub>46</sub> O <sub>4</sub> | 469.3306(-2.6) | 425.3416[M-H-CO <sub>2</sub> ] <sup>-</sup>    | 471.3479(1.1)  | 453.3398[M+H-H <sub>2</sub> O] <sup>+</sup>       | Glycyrrhetic acid                             |
|     |        |                                                |                | 355.2609[M-H-CO <sub>2</sub> -ME] <sup>-</sup> |                | 425.2890[M+H-HCOOH] <sup>+</sup>                  |                                               |
|     |        |                                                |                |                                                |                | 407.2775[M+H-HCOOH-H <sub>2</sub> O] <sup>+</sup> |                                               |
| 120 | 14.606 | C <sub>25</sub> H <sub>26</sub> O <sub>6</sub> | 421.1646(-1.2) | 193.0862[MBT-H] <sup>-</sup>                   |                |                                                   | Glyurallin B/Isoangustone A<br>/Angustone A   |
| 121 | 14.634 | C <sub>24</sub> H <sub>28</sub> O <sub>4</sub> |                |                                                | 381.2062(-1.0) | 363.1953[M+H-H <sub>2</sub> O] <sup>+</sup>       | Tokinolide B or its isomer                    |
|     |        |                                                |                |                                                |                | 335.2003[M+H-H <sub>2</sub> O-CO] <sup>+</sup>    |                                               |
|     |        |                                                |                |                                                |                | 191.1071[M+H-ZBD] <sup>+</sup>                    |                                               |
|     |        |                                                |                |                                                |                | 173.0966[M+H-ZBD-H <sub>2</sub> O] <sup>+</sup>   |                                               |
| 122 | 14.852 | C <sub>24</sub> H <sub>28</sub> O <sub>4</sub> |                |                                                | 381.2070(1.0)  | 363.1960[M+H-H <sub>2</sub> O] <sup>+</sup>       | Levistolide A                                 |
|     |        |                                                |                |                                                |                | 335.2015[M+H-H <sub>2</sub> O-CO] <sup>+</sup>    |                                               |
|     |        |                                                |                |                                                |                | 191.1076[M+H-ZBD] <sup>+</sup>                    |                                               |
|     |        |                                                |                |                                                |                | 173.0966[M+H-ZBD-H <sub>2</sub> O] <sup>+</sup>   |                                               |
| 123 | 14.966 | C <sub>24</sub> H <sub>28</sub> O <sub>4</sub> |                |                                                | 381.2063(-0.8) | 363.1958[M+H-H <sub>2</sub> O] <sup>+</sup>       | Angelicide or its isomer                      |
|     |        |                                                |                |                                                |                | 335.2008[M+H-H <sub>2</sub> O-CO] <sup>+</sup>    |                                               |
|     |        |                                                |                |                                                |                | 191.1082[M+H-ZBD] <sup>+</sup>                    |                                               |
|     |        |                                                |                |                                                |                | 173.0966[M+H-ZBD-H <sub>2</sub> O] <sup>+</sup>   |                                               |
| 124 | 15.052 | C <sub>24</sub> H <sub>28</sub> O <sub>4</sub> |                |                                                | 381.2068(0.5)  | 363.1956[M+H-H <sub>2</sub> O] <sup>+</sup>       | Z,Z'-6.8',7.3'-Diligustilide or its<br>isomer |
|     |        |                                                |                |                                                |                | 191.1077[M+H-ZBD] <sup>+</sup>                    |                                               |
|     |        |                                                |                |                                                |                | 173.0965[M+H-ZBD-H <sub>2</sub> O] <sup>+</sup>   |                                               |
| 125 | 15.481 | C <sub>24</sub> H <sub>28</sub> O <sub>4</sub> |                |                                                | 381.2057(-2.4) | 191.1071[M+H-ZBD] <sup>+</sup>                    | Z-Ligustilide dimer E-232 or its              |

|     |        |                                                |                |                                                                                                                                                              |                |                                                                                                                                                                                        |                                                |
|-----|--------|------------------------------------------------|----------------|--------------------------------------------------------------------------------------------------------------------------------------------------------------|----------------|----------------------------------------------------------------------------------------------------------------------------------------------------------------------------------------|------------------------------------------------|
|     |        |                                                |                |                                                                                                                                                              |                |                                                                                                                                                                                        | isomer                                         |
| 126 | 15.601 | C <sub>39</sub> H <sub>54</sub> O <sub>6</sub> | 617.3837(-0.8) | 573.3922[M-H-CO <sub>2</sub> ] <sup>-</sup><br>453.3256[M-H-HDPA] <sup>-</sup>                                                                               | 619.3985(-2.3) | 173.0959[M+H-ZBD-H <sub>2</sub> O] <sup>+</sup><br>601.3856[M+H-H <sub>2</sub> O] <sup>+</sup><br>455.3493[M+H-HDPA] <sup>+</sup><br>437.3414[M+H-HDPA-H <sub>2</sub> O] <sup>+</sup>  | p-Coumaroyl maslinic acid                      |
| 127 | 15.681 | C <sub>24</sub> H <sub>28</sub> O <sub>4</sub> |                |                                                                                                                                                              | 381.2047(-5.0) | 363.1944[M+H-H <sub>2</sub> O] <sup>+</sup><br>191.1069[M+H-ZBD] <sup>+</sup><br>173.0961[M+H-ZBD-H <sub>2</sub> O] <sup>+</sup><br>145.1018[M+H-ZBD-HCOO<br>H] <sup>+</sup>           | Neodiligustilide or its isomer                 |
| 128 | 15.932 | C <sub>25</sub> H <sub>24</sub> O <sub>6</sub> | 419.1495(0.0)  | 404.1255[M-H-CH <sub>3</sub> ] <sup>-</sup><br>375.1601[M-H-CO <sub>2</sub> ] <sup>-</sup><br>219.0655[M-H-EDC] <sup>-</sup><br>199.0754[EDC-H] <sup>-</sup> |                | 403.1885[M+H-H <sub>2</sub> O] <sup>+</sup><br>365.1022[M+H-BT] <sup>+</sup><br>347.0907[M+H-BT-H <sub>2</sub> O] <sup>+</sup>                                                         | gancaonin H                                    |
| 129 | 16.098 | C <sub>24</sub> H <sub>28</sub> O <sub>4</sub> |                |                                                                                                                                                              | 381.2064(-0.5) | 363.1938[M+H-H <sub>2</sub> O] <sup>+</sup><br><br>335.2002[M+H-H <sub>2</sub> O-CO] <sup>+</sup><br>191.1073[M+H-ZBD] <sup>+</sup><br>173.0967[M+H-ZBD-H <sub>2</sub> O] <sup>+</sup> | Z,Z'-3.3',8.8'-Diligustilide or its isomer     |
| 130 | 16.195 | C <sub>24</sub> H <sub>28</sub> O <sub>4</sub> |                |                                                                                                                                                              | 381.2068(0.5)  | 191.1067[M+H-ZBD] <sup>+</sup><br><br>173.0962[M+H-ZBD-H <sub>2</sub> O] <sup>+</sup><br>145.1012[M+H-ZBD-HCOO<br>H] <sup>+</sup>                                                      | E,E'-3.3', 8.8'-Diligustilide or its isomer    |
| 131 | 16.292 | C <sub>24</sub> H <sub>28</sub> O <sub>4</sub> |                |                                                                                                                                                              | 381.2062(-1.0) | 363.1955[M+H-H <sub>2</sub> O] <sup>+</sup>                                                                                                                                            | E,E'-3.8', 8.3'-Isodiligustilide or its isomer |

|     |        |                                                |                |                                                                                                                                                                                                                                                                                                                               |                                                                  |
|-----|--------|------------------------------------------------|----------------|-------------------------------------------------------------------------------------------------------------------------------------------------------------------------------------------------------------------------------------------------------------------------------------------------------------------------------|------------------------------------------------------------------|
| 132 | 17.390 | C <sub>24</sub> H <sub>28</sub> O <sub>4</sub> | 381.2059(-1.8) | 335.2032[M+H-H <sub>2</sub> O-CO] <sup>+</sup><br>191.1073[M+H-ZBD] <sup>+</sup><br>173.0963[M+H-ZBD-H <sub>2</sub> O] <sup>+</sup><br>363.1923[M+H-H <sub>2</sub> O] <sup>+</sup>                                                                                                                                            | 3,3'Z-6.7',7.6'-Diligustilide or its isomer                      |
| 133 | 17.521 | C <sub>24</sub> H <sub>28</sub> O <sub>4</sub> | 381.2062(-1.0) | 335.2007[M+H-H <sub>2</sub> O-CO] <sup>+</sup><br>191.1071[M+H-ZBD] <sup>+</sup><br>173.0965[M+H-ZBD-H <sub>2</sub> O] <sup>+</sup><br>363.1971[M+H-H <sub>2</sub> O] <sup>+</sup>                                                                                                                                            | 3α.7'α,7α.3'α-Diligustilide or its isomer                        |
| 134 | 17.784 | C <sub>24</sub> H <sub>28</sub> O <sub>4</sub> | 381.2063(-0.8) | 335.1998[M+H-H <sub>2</sub> O-CO] <sup>+</sup><br>191.1070[M+H-ZBD] <sup>+</sup><br>173.0964[M+H-ZBD-H <sub>2</sub> O] <sup>+</sup><br>363.1975[M+H-H <sub>2</sub> O] <sup>+</sup><br><br>335.2022[M+H-H <sub>2</sub> O-CO] <sup>+</sup><br>191.1069[M+H-ZBD] <sup>+</sup><br>173.0958[M+H-ZBD-H <sub>2</sub> O] <sup>+</sup> | (3')-(3R, 8S, 3'aR, 6'S)-3.3a', 8.6'-Biligustilide or its isomer |

Glc: Glucose, ADE: Adenine, HDTDO: (1aS,1bS,3S,5aR,6aS)-3-hydroxytetrahydro-5H-oxireno[2',3':4,5]furo[3,2-d][1,3,2]dioxaphosphinine 3-oxide, DTFD: (4aR,7S,7aS)-2,7-dihydroxytetrahydro-4H-furo[3,2-d][1,3,2]dioxaphosphinin-6-ide 2-oxide, GA: Gallic acid, BZ: Benzoic Acid, 4-OH-BZ: 4-hydroxyl-benzoic acid, 2-OH-BZ: 2-hydroxyl-benzoic acid, HB: 4-hydroxy-3-methoxybenzoic acid, VP: 4-vinylphenol, Api:apiose, MB: methyl benzoate, MG: ((2R,3S,4R,5S)-3,4,5-trihydroxytetrahydro-6H-pyran-2-yl)methyl 3,4,5-trihydroxybenzoate, Arab: Arabinose, BH:2-o-Benzaldehyde, RL:resorcinol, HM: 3-hydroxy-3-methylglutaroyl, Rha: rhamnose, PC: P-coumaroyl, GlcA: glucuronic acid, PM:2-methoxy-coumaroyl, PE: 3-methoxy-5-(3H-propyl)benzene-1,2-diol, BT: isobutylene, MVD: 3-methoxy-4-vinylbenzene-1,2-diol, PP: propylene, PA: 3-methylbuta-1,2-diene, BE: benzene-1,3,5-triol, PI: pentanol-iosprene, IP: isoprene, DCO: 2,2-dimethyl-2H-chromen-5-ol, OCD: 4-oxomethylidenecyclohexa-2,5-dienone, PH: phenol, MMEV: 5-methoxy-2-(2-methylbut-3-en-2-yl)-4-vinylphenol, MPEO:

2-methylpent-4-en-2-ol, PP: propylene, 2DO:2,2-dimethyl-2H-oxete, MBV: 2-(3-methylbut-2-en-1-yl)-4-vinylphenol, DOT: 2,4-dimethoxy-3-(3-methylbut-2-en-1-yl)-7-oxabicyclo[4.2.0]octa-1,3,5-triene, MLT: 4-vinylbenzene-1,3-diol, BF: 2-(2-hydroxypropan-2-yl)-2,3-dihydrobenzofuran-6-ol, APP: 1-(4-hydroxy-3-(3-methylbut-2-en-1-yl)phenyl)ethan-1-one, ISD: 2-methylpropan-2-ol, ISP: propan-2-ol, HMDB:4-hydroxy-3-(3-methylbuta-1,2-dien-1-yl)benzaldehyde, HMBB:4-hydroxy-3-(3-methylbut-2-en-1-yl)benzaldehyde, DCE: 2-(3,4-dihydroxyphenyl)cycloprop-2-en-1-one, ZBD: (Z)-3-butylidene-4,5-dihydroisobenzofuran-1(3H)-one, DMP: 2-(2,4-dihydroxy-3-(3-methylbut-2-en-1-yl)phenyl)propanal, MBT: 2-(3-methylbut-2-en-1-yl)benzene-1,3,5-triol, ME:3-methylbut-1-ene, HDPA: (E)-3-(4-hydroxyphenyl)acrylic acid, EDC: 6-ethynyl-2,2-dimethyl-2H-chromen-8-ol

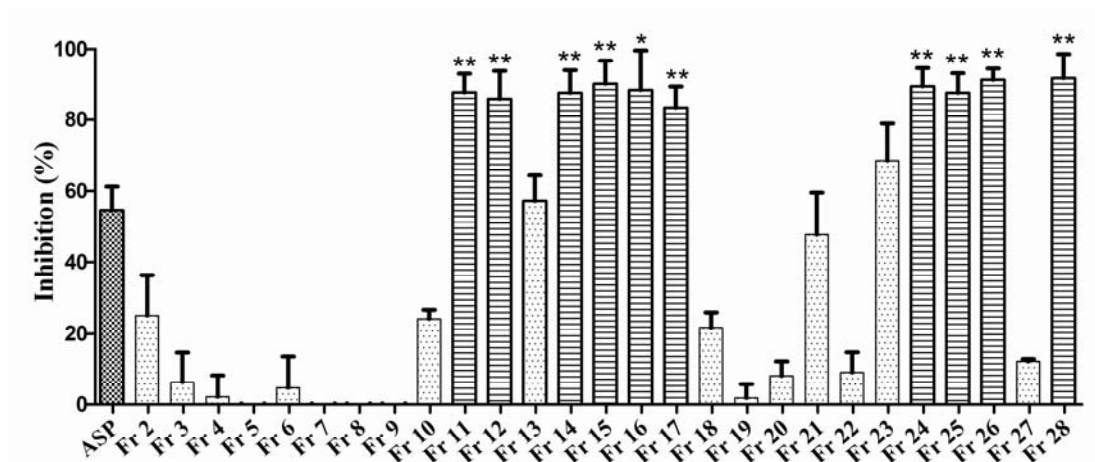

Supplementary Figure S1. The anti-platelet effects of the fractions from DJF. Significant difference with respect to aspirin (ASP): \*,  $p < 0.05$ ; \*\*,  $p < 0.01$ .

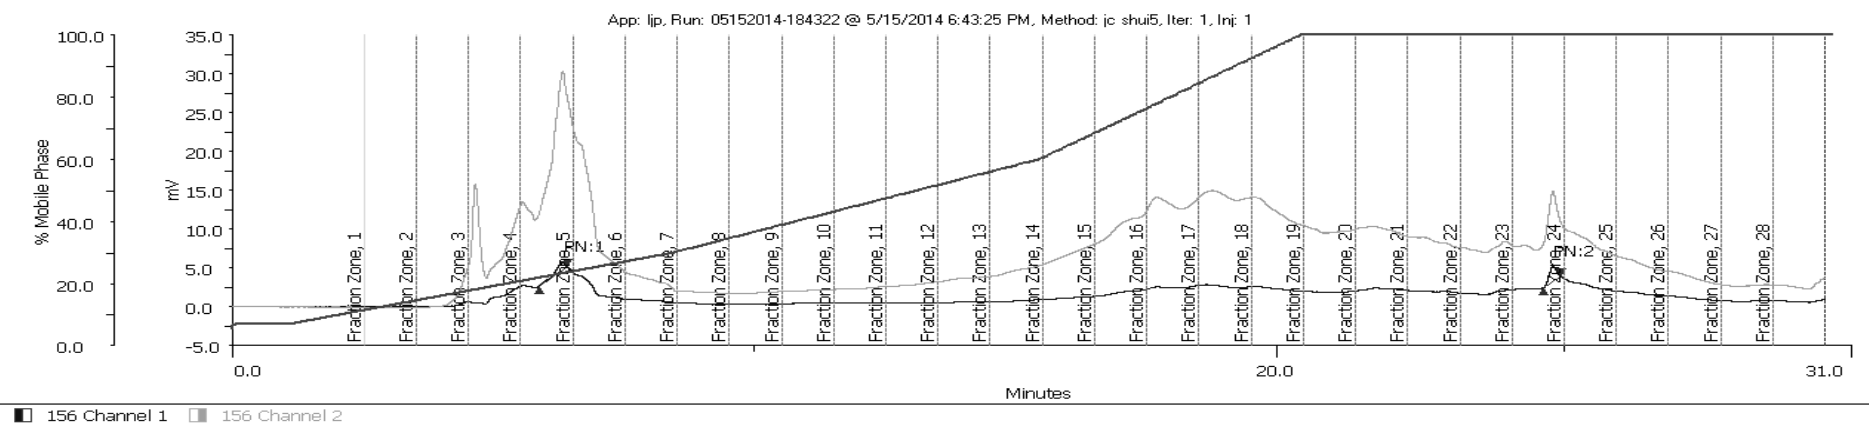

Supplementary Figure S2. The preparative chromatogram of DJF extractions.

Supplementary Table S2. The potential target proteins in the DT network.

| Protein name                                                                 | Uniprot ID |
|------------------------------------------------------------------------------|------------|
| Thrombin                                                                     | P00734     |
| Thromboxane A2 receptor                                                      | P21731     |
| Proteinase-activated receptor 1                                              | P25116     |
| Proteinase-activated receptor 4                                              | Q96RI0     |
| P2Y purinoceptor 1                                                           | P47900     |
| P2Y purinoceptor 12                                                          | Q9H244     |
| Prostacyclin receptor                                                        | P43119     |
| Cytosolic phospholipase A2                                                   | P47712     |
| Guanine nucleotide-binding protein G(q) subunit a                            | P50148     |
| Guanine nucleotide-binding protein G(s) subunit a                            | P63092     |
| Phosphatidylinositol 4,5-bisphosphate 3-kinase catalytic subunit a           | P42336     |
| Phosphatidylinositol 4,5-bisphosphate 3-kinase catalytic subunit b           | P42338     |
| Phosphatidylinositol 4,5-bisphosphate 3-kinase catalytic subunit g           | P48736     |
| Phosphatidylinositol 4,5-bisphosphate 3-kinase catalytic subunit d           | O00329     |
| Phosphatidylinositol 3-kinase regulatory subunit a                           | P27986     |
| Phosphatidylinositol 3-kinase regulatory subunit b                           | O00459     |
| Phosphatidylinositol 3-kinase regulatory subunit g                           | Q92569     |
| Phosphatidylinositol 3-kinase regulatory subunit 5                           | Q8WYR1     |
| 1-phosphatidylinositol 4,5-bisphosphate phosphodiesterase b-1                | Q9NQ66     |
| 1-phosphatidylinositol 4,5-bisphosphate phosphodiesterase b-2                | Q00722     |
| 1-phosphatidylinositol 4,5-bisphosphate phosphodiesterase b-3                | Q01970     |
| 1-phosphatidylinositol 4,5-bisphosphate phosphodiesterase b-4                | Q15147     |
| Adenylate cyclase type 1                                                     | Q08828     |
| Adenylate cyclase type 2                                                     | Q08462     |
| Adenylate cyclase type 3                                                     | O60266     |
| Adenylate cyclase type 4                                                     | Q8NFM4     |
| Adenylate cyclase type 5                                                     | O95622     |
| Adenylate cyclase type 6                                                     | O43306     |
| Adenylate cyclase type 7                                                     | P51828     |
| Adenylate cyclase type 8                                                     | P40145     |
| Adenylate cyclase type 9                                                     | O60503     |
| Lymphocyte cytosolic protein 2                                               | Q13094     |
| 1-phosphatidylinositol 4,5-bisphosphate phosphodiesterase g-2                | P16885     |
| Tyrosine-protein kinase BTK                                                  | Q06187     |
| Prostaglandin G/H synthase 1 (COX-1)                                         | P23219     |
| Protein kinase C                                                             | P41743     |
| RAS guanyl-releasing protein 1                                               | O95267     |
| RAS guanyl-releasing protein 2                                               | Q7LDG7     |
| cAMP-dependent protein kinase catalytic subunit a                            | P17612     |
| Thromboxane-A synthase                                                       | P24557     |
| Ras-related protein Rap-1A                                                   | P62834     |
| Ras-related protein Rap-1b                                                   | P61224     |
| Vasodilator-stimulated phosphoprotein                                        | P50552     |
| Amyloid b A4 precursor protein-binding family B member 1-interacting protein | Q7Z5R6     |
| Actin, cytoplasmic 1                                                         | P60709     |
| Fermitin family homolog 3                                                    | Q86UX7     |
| Talin-1                                                                      | Q9Y490     |
| Talin-2                                                                      | Q9Y4G6     |
| Integrin a-IIb                                                               | P08514     |
| Integrin b-3                                                                 | P05106     |
| Fibrinogen a chain                                                           | P02671     |
| Fibrinogen b chain                                                           | P02675     |

|                                                     |        |
|-----------------------------------------------------|--------|
| Fibrinogen g chain                                  | P02679 |
| Guanine nucleotide-binding protein G(i) subunit a-1 | P63096 |
| Synaptosomal-associated protein 23                  | O00161 |
| Vesicle-associated membrane protein 8               | Q9BV40 |

---

Supplementary Table S3. The elution condition for DJF fractionating

| Time (min) | A% | B%  |
|------------|----|-----|
| 0          | 95 | 5   |
| 8          | 70 | 30  |
| 15         | 40 | 60  |
| 20         | 0  | 100 |
| 30         | 0  | 100 |

Supplementary Table S4. The elution condition for ingredient identification

| Time(min) | A% | B% |
|-----------|----|----|
| 0         | 95 | 5  |
| 20        | 5  | 95 |
| 22        | 5  | 95 |

Supplementary Table S5. The elution condition for the plasma concentration testing

| Time (min) | A% | B%  |
|------------|----|-----|
| 0          | 95 | 5   |
| 3          | 85 | 15  |
| 8          | 75 | 25  |
| 36         | 5  | 95  |
| 37         | 0  | 100 |
| 40         | 0  | 100 |



Supplementary Table S6. The composition of the Tris buffer solution.

| Chemicals                       | Concentration (mM) | Weight (g) |
|---------------------------------|--------------------|------------|
| NaCl                            | 130                | 3.042      |
| Sodium citrate                  | 10                 | 1.1764     |
| NaHCO <sub>3</sub>              | 9                  | 0.3024     |
| Glucose                         | 6                  | 0.432      |
| MgCl <sub>2</sub>               | 0.9                | 0.0342     |
| KH <sub>2</sub> PO <sub>4</sub> | 0.81               | 0.04406    |
| Tris-base                       | 10                 | 0.4844     |

Supplementary Table S7. The composition of the ACD solution.

| Chemicals      | Concentration (mM) | Weight (g) |
|----------------|--------------------|------------|
| Sodium citrate | 75                 | 0.882      |
| Glucose        | 124                | 0.893      |
| Citrate acid   | 38                 | 0.292      |

Supplementary Table S8. The grouping of the platelet aggregation experiments.

| Group         | Constituent                                                                      |
|---------------|----------------------------------------------------------------------------------|
| Negative      | 100mL platelets + 50mL buffer solution + 50mL (agonist and CaCl <sub>2</sub> )   |
| Positive      | 100mL platelets + 50mL reagent solution + 50mL (agonist and CaCl <sub>2</sub> )  |
| Investigating | 100mL platelets + 50mL compound solution + 50mL (agonist and CaCl <sub>2</sub> ) |
| Control       | 150mL buffer solution + 50mL compound solution                                   |

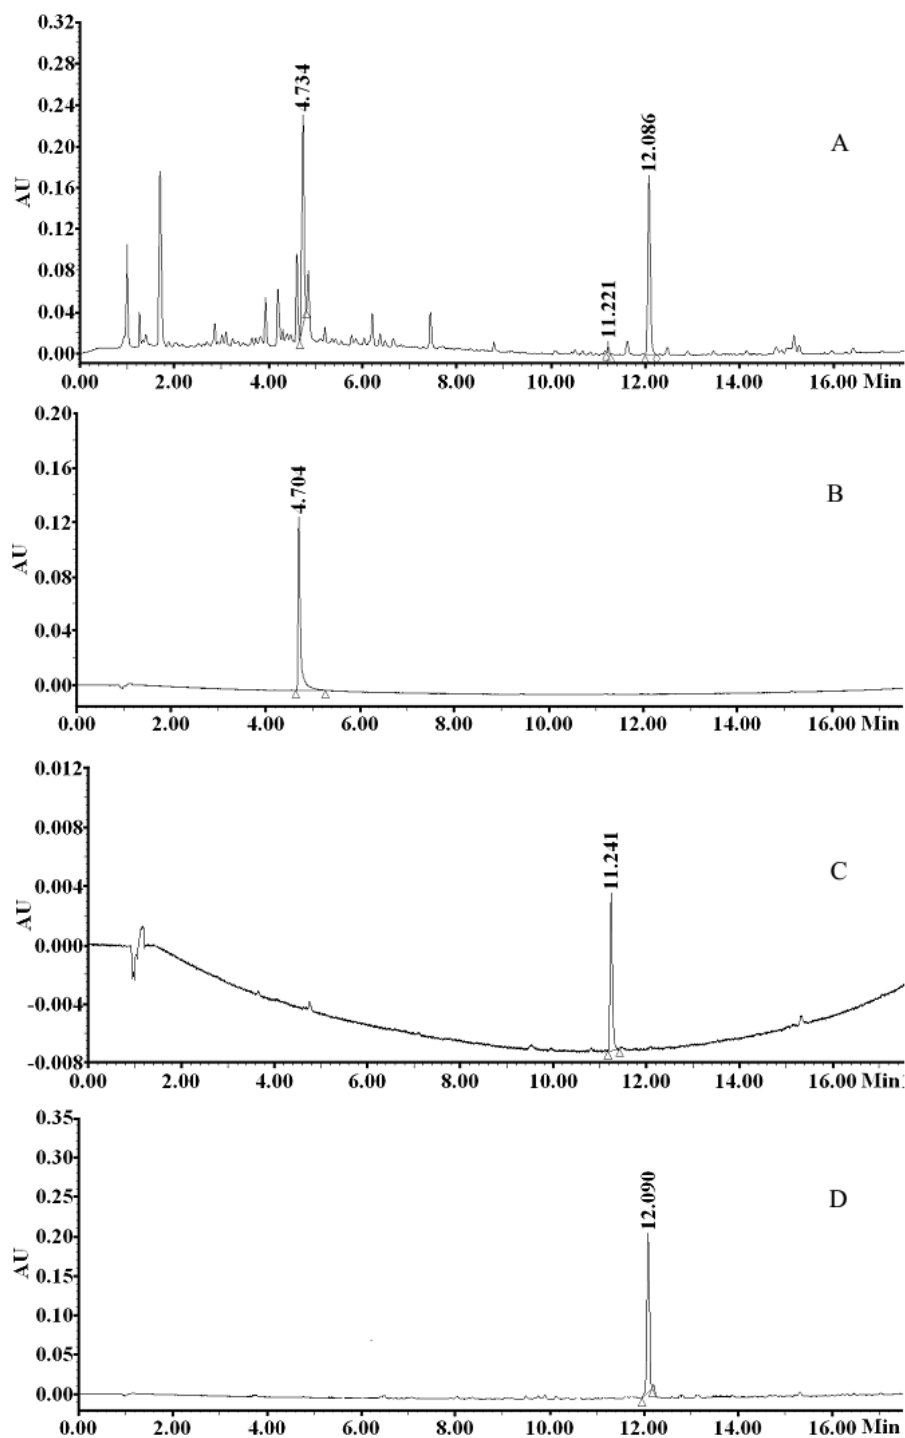

Supplementary Figure S3. The UPLC-DAD chromatograms of DJF, showing the full formula (A, 40.88mg/mL ), along with the data of the standard solutions of Pentagalloylglucose (B, 28.9 $\mu$ g/mL ), Licochalcone A (C, 0.96 $\mu$ g/mL) and (Z)-ligustilide (D, 128.0 $\mu$ g/mL).

Supplementary Table S9. The composition of the 3-compound formulae

| Composition<br>Groups           | Pentagalloylglucose | Licochalcone A | (Z)-Ligustilide |
|---------------------------------|---------------------|----------------|-----------------|
| RF <sub>1</sub> -C <sub>1</sub> | 46.25µg/mL          | 46.25µg/mL     | 47.50µg/mL      |
| RF <sub>1</sub> -C <sub>2</sub> | 23.13µg/mL          | 23.13µg/mL     | 23.75µg/mL      |
| RF <sub>1</sub> -C <sub>3</sub> | 11.57µg/mL          | 11.57µg/mL     | 11.88µg/mL      |
| RF <sub>2</sub> -C <sub>1</sub> | 45.00µg/mL          | 1.25µg/mL      | 155.00µg/mL     |
| RF <sub>2</sub> -C <sub>2</sub> | 22.50µg/mL          | 0.63µg/mL      | 77.50µg/mL      |
| RF <sub>2</sub> -C <sub>3</sub> | 11.25µg/mL          | 0.32µg/mL      | 38.75µg/mL      |
